# Supplementary material
Source: HighWire-hosted journal article supplement (https://bmjopen.bmj.com/content/15/4/e097826)
Supplement: inline-supplementary-material-1 [file inline-supplementary-material-1.pdf]

## Supplementary File 1

## Preferred Reporting Items for Systematic reviews and Meta-Analyses extension for Scoping Reviews (PRISMA-ScR) Checklist

| SECTION                                               | ITEM | PRISMA-ScR CHECKLIST ITEM                                                                                                                                                                                                                                                                                  | REPORTED ON PAGE # |
|-------------------------------------------------------|------|------------------------------------------------------------------------------------------------------------------------------------------------------------------------------------------------------------------------------------------------------------------------------------------------------------|--------------------|
| <b>TITLE</b>                                          |      |                                                                                                                                                                                                                                                                                                            |                    |
| Title                                                 | 1    | Identify the report as a scoping review.                                                                                                                                                                                                                                                                   | 1                  |
| <b>ABSTRACT</b>                                       |      |                                                                                                                                                                                                                                                                                                            |                    |
| Structured summary                                    | 2    | Provide a structured summary that includes (as applicable): background, objectives, eligibility criteria, sources of evidence, charting methods, results, and conclusions that relate to the review questions and objectives.                                                                              | 2                  |
| <b>INTRODUCTION</b>                                   |      |                                                                                                                                                                                                                                                                                                            |                    |
| Rationale                                             | 3    | Describe the rationale for the review in the context of what is already known. Explain why the review questions/objectives lend themselves to a scoping review approach.                                                                                                                                   | 3                  |
| Objectives                                            | 4    | Provide an explicit statement of the questions and objectives being addressed with reference to their key elements (e.g., population or participants, concepts, and context) or other relevant key elements used to conceptualize the review questions and/or objectives.                                  | 3-4                |
| <b>METHODS</b>                                        |      |                                                                                                                                                                                                                                                                                                            |                    |
| Protocol and registration                             | 5    | Indicate whether a review protocol exists; state if and where it can be accessed (e.g., a Web address); and if available, provide registration information, including the registration number.                                                                                                             | 4                  |
| Eligibility criteria                                  | 6    | Specify characteristics of the sources of evidence used as eligibility criteria (e.g., years considered, language, and publication status), and provide a rationale.                                                                                                                                       | 5                  |
| Information sources*                                  | 7    | Describe all information sources in the search (e.g., databases with dates of coverage and contact with authors to identify additional sources), as well as the date the most recent search was executed.                                                                                                  | 5                  |
| Search                                                | 8    | Present the full electronic search strategy for at least 1 database, including any limits used, such that it could be repeated.                                                                                                                                                                            | 5-6                |
| Selection of sources of evidence†                     | 9    | State the process for selecting sources of evidence (i.e., screening and eligibility) included in the scoping review.                                                                                                                                                                                      | 6                  |
| Data charting process‡                                | 10   | Describe the methods of charting data from the included sources of evidence (e.g., calibrated forms or forms that have been tested by the team before their use, and whether data charting was done independently or in duplicate) and any processes for obtaining and confirming data from investigators. | 6-7                |
| Data items                                            | 11   | List and define all variables for which data were sought and any assumptions and simplifications made.                                                                                                                                                                                                     | 7                  |
| Critical appraisal of individual sources of evidence§ | 12   | If done, provide a rationale for conducting a critical appraisal of included sources of evidence; describe the methods used and how this information was used in any data synthesis (if appropriate).                                                                                                      | Not applicable     |
| Synthesis of results                                  | 13   | Describe the methods of handling and summarizing the data that were charted.                                                                                                                                                                                                                               | 7                  |

| SECTION                                       | ITEM | PRISMA-ScR CHECKLIST ITEM                                                                                                                                                                       | REPORTED ON PAGE # |
|-----------------------------------------------|------|-------------------------------------------------------------------------------------------------------------------------------------------------------------------------------------------------|--------------------|
| RESULTS                                       |      |                                                                                                                                                                                                 |                    |
| Selection of sources of evidence              | 14   | Give numbers of sources of evidence screened, assessed for eligibility, and included in the review, with reasons for exclusions at each stage, ideally using a flow diagram.                    | 8-9                |
| Characteristics of sources of evidence        | 15   | For each source of evidence, present characteristics for which data were charted and provide the citations.                                                                                     | 8-9                |
| Critical appraisal within sources of evidence | 16   | If done, present data on critical appraisal of included sources of evidence (see item 12).                                                                                                      | Not applicable     |
| Results of individual sources of evidence     | 17   | For each included source of evidence, present the relevant data that were charted that relate to the review questions and objectives.                                                           | 10                 |
| Synthesis of results                          | 18   | Summarize and/or present the charting results as they relate to the review questions and objectives.                                                                                            | 10-13              |
| DISCUSSION                                    |      |                                                                                                                                                                                                 |                    |
| Summary of evidence                           | 19   | Summarize the main results (including an overview of concepts, themes, and types of evidence available), link to the review questions and objectives, and consider the relevance to key groups. | 10-13              |
| Limitations                                   | 20   | Discuss the limitations of the scoping review process.                                                                                                                                          | 13                 |
| Conclusions                                   | 21   | Provide a general interpretation of the results with respect to the review questions and objectives, as well as potential implications and/or next steps.                                       | 14                 |
| FUNDING                                       |      |                                                                                                                                                                                                 |                    |
| Funding                                       | 22   | Describe sources of funding for the included sources of evidence, as well as sources of funding for the scoping review. Describe the role of the funders of the scoping review.                 | 15                 |

JB1 = Joanna Briggs Institute; PRISMA-ScR = Preferred Reporting Items for Systematic reviews and Meta-Analyses extension for Scoping Reviews.

\* Where *sources of evidence* (see second footnote) are compiled from, such as bibliographic databases, social media platforms, and Web sites.

† A more inclusive/heterogeneous term used to account for the different types of evidence or data sources (e.g., quantitative and/or qualitative research, expert opinion, and policy documents) that may be eligible in a scoping review as opposed to only studies. This is not to be confused with *information sources* (see first footnote).

‡ The frameworks by Arksey and O'Malley (6) and Levac and colleagues (7) and the JBI guidance (4, 5) refer to the process of data extraction in a scoping review as data charting.

§ The process of systematically examining research evidence to assess its validity, results, and relevance before using it to inform a decision. This term is used for items 12 and 19 instead of "risk of bias" (which is more applicable to systematic reviews of interventions) to include and acknowledge the various sources of evidence that may be used in a scoping review (e.g., quantitative and/or qualitative research, expert opinion, and policy document).

From: Tricco AC, Lillie E, Zarin W, O'Brien KK, Colquhoun H, Levac D, et al. PRISMA Extension for Scoping Reviews (PRISMA-ScR): Checklist and Explanation. *Ann Intern Med*. 2018;169:467–473. doi: 10.7326/M18-0850.

Supplementary file 2

The policy source of departments affiliated with the province government website  
(Heilongjiang and Guangdong)

| ID | Name in Chinese   | Government administration                                                                      | URL of website                                                                                      |
|----|-------------------|------------------------------------------------------------------------------------------------|-----------------------------------------------------------------------------------------------------|
| 1  | 黑龙江省政府办公厅         | People's Government of Heilongjiang Province                                                   | <a href="https://www.hlj.gov.cn/index.shtml">https://www.hlj.gov.cn/index.shtml</a>                 |
| 2  | 黑龙江省发展和改革委员会      | Heilongjiang Development and Reform Commission                                                 | <a href="https://drc.hlj.gov.cn/">https://drc.hlj.gov.cn/</a>                                       |
| 3  | 黑龙江省教育厅           | Education Department of Heilongjiang Province                                                  | <a href="https://jyt.hlj.gov.cn/">https://jyt.hlj.gov.cn/</a>                                       |
| 4  | 黑龙江省科学技术厅         | Department of Science and Technology of Heilongjiang Province                                  | <a href="https://kjt.hlj.gov.cn/">https://kjt.hlj.gov.cn/</a>                                       |
| 5  | 黑龙江省工业和信息化厅       | Department of Industry and Information of Technology of Heilongjiang Province                  | <a href="http://gxt.hlj.gov.cn/">http://gxt.hlj.gov.cn/</a>                                         |
| 6  | 黑龙江省民政厅           | Department of Civil Affairs of Heilongjiang Province                                           | <a href="https://mzt.hlj.gov.cn/">https://mzt.hlj.gov.cn/</a>                                       |
| 7  | 黑龙江省财政厅           | Finance Bureau of Heilongjiang Province                                                        | <a href="https://czt.hlj.gov.cn/czt/index.shtml">https://czt.hlj.gov.cn/czt/index.shtml</a>         |
| 8  | 黑龙江省人力资源和社会保障厅    | Heilongjiang Resources and Social Security Bureau                                              | <a href="http://hrss.hlj.gov.cn/">http://hrss.hlj.gov.cn/</a>                                       |
| 9  | 黑龙江省住房和城乡建设厅      | Department of Housing and Urban-rural Development of Heilongjiang                              | <a href="https://zfcxjst.hlj.gov.cn/">https://zfcxjst.hlj.gov.cn/</a>                               |
| 10 | 黑龙江省农业农村厅         | Department of Agriculture and Rural Affairs of Heilongjiang Province                           | <a href="https://nynct.hlj.gov.cn/nynct/index.shtml">https://nynct.hlj.gov.cn/nynct/index.shtml</a> |
| 11 | 黑龙江省卫生健康委员会       | Health Commission of Heilongjiang Province                                                     | <a href="https://wsjkw.hlj.gov.cn/">https://wsjkw.hlj.gov.cn/</a>                                   |
| 12 | 黑龙江省市场监督管理局       | Administration for Market Regulation of Heilongjiang Province                                  | <a href="https://amr.hlj.gov.cn/">https://amr.hlj.gov.cn/</a>                                       |
| 13 | 黑龙江省体育局           | Heilongjiang Provincial Sports Bureau                                                          | <a href="https://tyj.hlj.gov.cn/">https://tyj.hlj.gov.cn/</a>                                       |
| 14 | 黑龙江省统计局           | Heilongjiang Bureau of Statistics                                                              | <a href="https://tjj.hlj.gov.cn/">https://tjj.hlj.gov.cn/</a>                                       |
| 15 | 黑龙江省医疗保障局         | Heilongjiang Province Healthcare Security Administration                                       | <a href="https://ybj.hlj.gov.cn/">https://ybj.hlj.gov.cn/</a>                                       |
| 16 | 黑龙江省地方金融监督管理局     | Heilongjiang Local Financial Supervision and Administration Bureau                             | <a href="https://dfjrgj.hlj.gov.cn/">https://dfjrgj.hlj.gov.cn/</a>                                 |
| 17 | 黑龙江省营商环境建设监督局     | Heilongjiang Business Environment Construction Supervision Bureau                              | <a href="https://bec.hlj.gov.cn/?from=screen">https://bec.hlj.gov.cn/?from=screen</a>               |
| 18 | 黑龙江省乡村振兴局         | Heilongjiang Provincial Rural Revitalization Bureau                                            | <a href="https://fpb.hlj.gov.cn/fpb/index.shtml">https://fpb.hlj.gov.cn/fpb/index.shtml</a>         |
| 19 | 黑龙江省粮食和物资储备局      | Heilongjiang Provincial Food and Material Reserve Bureau                                       | <a href="https://lsj.hlj.gov.cn/">https://lsj.hlj.gov.cn/</a>                                       |
| 20 | 黑龙江省药品监督管理局       | Heilongjiang Provincial Durg Administration                                                    | <a href="https://mpa.hlj.gov.cn/">https://mpa.hlj.gov.cn/</a>                                       |
| 21 | 黑龙江省知识产权局         | Heilongjiang Intellectual Property Administration                                              | <a href="https://hlipa.hlj.gov.cn/">https://hlipa.hlj.gov.cn/</a>                                   |
| 22 | 黑龙江省中医药管理局        | Heilongjiang Provincial Administration of Traditional Chinese Medicine                         | <a href="https://tcm.hlj.gov.cn/">https://tcm.hlj.gov.cn/</a>                                       |
| 23 | 广东省人民政府           | People's Government of Guangdong Province                                                      | <a href="http://www.gd.gov.cn/">http://www.gd.gov.cn/</a>                                           |
| 24 | 广东省发展和改革委员会       | Guangdong Provincial Development and Reform Commission                                         | <a href="http://drc.gd.gov.cn/">http://drc.gd.gov.cn/</a>                                           |
| 25 | 广东省教育厅            | Department of Education of Guangdong Province                                                  | <a href="http://edu.gd.gov.cn/">http://edu.gd.gov.cn/</a>                                           |
| 26 | 广东省科学技术厅          | Department of Science and Technology of Guangdong Province                                     | <a href="http://gdstc.gd.gov.cn/">http://gdstc.gd.gov.cn/</a>                                       |
| 27 | 广东省工业和信息化厅        | Department of Industry and Information Technology of Guangdong Province                        | <a href="http://gdii.gd.gov.cn/">http://gdii.gd.gov.cn/</a>                                         |
| 28 | 广东省民政厅            | Department of Civil Affairs of Guangdong Province                                              | <a href="http://smzt.gd.gov.cn/">http://smzt.gd.gov.cn/</a>                                         |
| 29 | 广东省财政厅            | Department of Finance Guangdong Province                                                       | <a href="http://czt.gd.gov.cn/">http://czt.gd.gov.cn/</a>                                           |
| 30 | 广东省人力资源和社会保障厅     | Human Resources and Social Security Department of Guangdong Province                           | <a href="http://hrss.gd.gov.cn/">http://hrss.gd.gov.cn/</a>                                         |
| 31 | 广东省住房和城乡建设厅       | Department of Housing and Urban-rural Development of Guangdong Province                        | <a href="http://zfcxjst.gd.gov.cn/">http://zfcxjst.gd.gov.cn/</a>                                   |
| 32 | 广东省农业农村厅          | Department of Agriculture and Rural Affairs of Guangdong Province                              | <a href="http://dara.gd.gov.cn/">http://dara.gd.gov.cn/</a>                                         |
| 33 | 广东省卫生健康委员会        | Health Commission of Guangdong Province                                                        | <a href="http://wsjkw.gd.gov.cn/">http://wsjkw.gd.gov.cn/</a>                                       |
| 34 | 广东省市场监督管理局（知识产权局） | Guangdong Administration for Market Regulation(Guangdong Intellectual Property Administration) | <a href="http://amr.gd.gov.cn/">http://amr.gd.gov.cn/</a>                                           |

|    |              |                                                                  |                                                                   |
|----|--------------|------------------------------------------------------------------|-------------------------------------------------------------------|
| 35 | 广东省体育局       | Guangdong Provincial Sports Bureau                               | <a href="http://tyj.gd.gov.cn/">http://tyj.gd.gov.cn/</a>         |
| 36 | 广东省统计局       | Guangdong Provincial Statistics Bureau                           | <a href="http://stats.gd.gov.cn/">http://stats.gd.gov.cn/</a>     |
| 37 | 广东省医疗保障局     | Healthcare Security Administration of Guangdong Province         | <a href="http://hsa.gd.gov.cn/">http://hsa.gd.gov.cn/</a>         |
| 38 | 广东省地方金融监督管理局 | Guangdong Financial Supervisory Authority                        | <a href="http://gdjr.gd.gov.cn/">http://gdjr.gd.gov.cn/</a>       |
| 39 | 广东省乡村振兴局     | Rural Revitalization Administration of Guangdong Province        | <a href="http://rural.gd.gov.cn/">http://rural.gd.gov.cn/</a>     |
| 40 | 广东省粮食和物资储备局  | Food and Strategic Reserves Administration of Guangdong Province | <a href="http://gdgrain.gd.gov.cn/">http://gdgrain.gd.gov.cn/</a> |
| 41 | 广东省药品监督管理局   | Guangdong Provincial Drug Administration                         | <a href="http://mpa.gd.gov.cn/">http://mpa.gd.gov.cn/</a>         |
| 42 | 广东省中医药管理局    | Traditional Chinese Medicine Bureau of Guangdong Province        | <a href="http://szyyj.gd.gov.cn/">http://szyyj.gd.gov.cn/</a>     |

### Supplementary File 3

#### Search terms

In the search, we utilized the following Chinese-character keywords related to NCD[1-4]: "Man Xing Bing" (Chronic disease), and "Man Bing" (an abbreviation for NCDs in Chinese). To rule out major omissions of this search strategy, as the previous search strategies[5-7], we performed extensive searches on the same websites using the specific NCD-related terms: "Xin Zang Bing" (cardiovascular diseases), "Guan Xin Bing" (coronary heart disease), "Xin Ji Bing" (cardiomyopathy), "Xin Geng" (a shorthand for myocardial infarction in Chinese), "Gao Xin Bing" (hypertensive heart disease), "Fei Xin Bing" (pulmonary heart disease), "Gao Xue Ya" (hypertension), "Zhong Feng" (stroke), "Nao Chu Xue" (hemorrhagic stroke), "Nao Geng Si" (ischaemic stroke), "Nao Xue Shuan" (cerebral thrombosis), "Nao Shuan Sai" (cerebral embolism), "Ai Zheng" (cancer), "Zhong Liu" (tumor), "Man Zu Fei" (chronic obstructive pulmonary disease), "COPD" (the abbreviation for chronic obstructive pulmonary disease), "Xiao Chuan" (asthma), "Tang Niao Bing" (diabetes), "ji ceng" (a common expression of "primary health care "in China), "treatment", "prevention". It is noteworthy that hypertension and diabetes are required to be managed under the National Basic Public Health Service Program in China.

## Supplementary file 4

### Clarification of Exclusion Criteria

**National-Level Policies:** We excluded national-level policies because the primary focus of this study is to examine how provincial governments interpret, adapt, and implement national directives, rather than assessing national policy formulation itself. National policies typically provide broad strategic frameworks with overarching objectives but lack specific provincial implementation details, which are the core focus of our analysis. Given the variability in local policy adaptation, analyzing provincial-level documents enables a more precise evaluation of context-specific policy modifications and their implications for PHC-focused NCD prevention and control.

**Clinical and Pharmaceutical Guidelines:** Clinical guidelines are technical documents that primarily serve to standardize medical practice and treatment protocols, rather than acting as policy instruments that dictate governance, resource allocation, or system-wide health policy adjustments. As our study aims to assess policy frameworks, governance structures, and health system adaptation, clinical and pharmaceutical guidelines do not align with the study's objectives and were therefore excluded.

**Government Announcements and Interpretative Documents:** Some government-issued documents, such as announcements or interpretations of prior regulations, were excluded because they do not introduce new policies but rather explain or reaffirm existing directives. To maintain analytical consistency, we focused exclusively on primary policy documents that actively shape health system governance, financing, service delivery, and workforce organization.

Supplementary file 5

The essential data items of Included Province-Level and corresponding National-Level Policy Documents

| Serial number                    | Chinese title                        | English title                                                                                                                                                                  | Time of realise | Releasing department                                    | Referenced National-Level Policy Documents                                                                                                                                                                              |
|----------------------------------|--------------------------------------|--------------------------------------------------------------------------------------------------------------------------------------------------------------------------------|-----------------|---------------------------------------------------------|-------------------------------------------------------------------------------------------------------------------------------------------------------------------------------------------------------------------------|
| 11th five-year plan (2009-2010 ) |                                      |                                                                                                                                                                                |                 |                                                         |                                                                                                                                                                                                                         |
| H1                               | 黑龙江省医药卫生体制改革近期重点实施方案 ( 2009-2011 年 ) | The Plan and Recommended Priorities on Deeping the Health System Reform in Heilongjiang Province Reform (2009-2011)                                                            | 30-Nov-2009     | People's Government of Heilongjiang Province            | ①The Plan and Recommended Priorities for the Health Care System Reform (2009-2011)<br>②Recommendations by the CPC Central Committee and the State Council on Deepening the Reform of the Medical and Health Care System |
| G1                               | 广东省医药卫生体制五项重点改革 2010 年度主要工作安排        | Work Arrangements of Guangdong Province for the Reform of the Medical and Health Care System in Five Key Aspects (2010)                                                        | 24-Aug-2010     | People's Government of Guangdong Province               | Major Work Plans for the five Key Reforms of the Medical and Health System of 2010                                                                                                                                      |
| 12th five-year plan (2011-2015 ) |                                      |                                                                                                                                                                                |                 |                                                         |                                                                                                                                                                                                                         |
| H2                               | 黑龙江省医药卫生体制五项重点改革 2011 年度主要工作安排       | Work Arrangements of Heilongjiang Province for the Reform of the Medical and Health Care System in Five Key Aspects(2011)                                                      | 2-Apr-2011      | People's Government of Heilongjiang Province            | Major Work Plans for the Five Key Reforms of the Medical and Health System of 2011                                                                                                                                      |
| H3                               | 关于做好人社系统承担的 2011 年度医药卫生体制改革工作的通知     | Notice on Improving the Reform for the Medical and Health System of 2011 issued by Heilongjiang Provincial Leading Group for Deepening Reform of the Medical and Health System | 17-Jun-2011     | Heilongjiang Human Resources and Social Security Bureau | Major Work Plans for the Five Key Reforms of the Medical and Health System of 2011                                                                                                                                      |
| H4                               | 黑龙江省人民政府关于扶持和促进中医药事业发展的实施意见          | Implementation Opinions of the People's Government of Heilongjiang Province on Supporting and Promoting the Development of the Traditional Chinese Medicine Industry           | 20-Jun-2011     | People's Government of Heilongjiang Province            | Some Opinions of the State Council on Supporting and Promoting the Development of the Traditional Chinese Medicine Industry                                                                                             |

|     |                              |                                                                                                                                           |             |                                                                                                                                                                                                                                                  |                                                                                                                                                                                                                                                                                         |
|-----|------------------------------|-------------------------------------------------------------------------------------------------------------------------------------------|-------------|--------------------------------------------------------------------------------------------------------------------------------------------------------------------------------------------------------------------------------------------------|-----------------------------------------------------------------------------------------------------------------------------------------------------------------------------------------------------------------------------------------------------------------------------------------|
| H5  | 黑龙江省加强乡村医生队伍建设实施方案           | The Implementation Plan for Strengthening the Construction of the Rural Doctor Team in Heilongjiang Province                              | 28-Sep-2011 | People's Government of Heilongjiang Province                                                                                                                                                                                                     | Guidelines of the General Office of the State Council on Further Strengthening the Construction of Rural Doctor Teams                                                                                                                                                                   |
| H6  | 黑龙江省爱卫会关于加强健康教育与健康促进工作的指导意见  | Guidelines of the Heilongjiang Patriotic Health Campaign Committee on Strengthening Health Education and Health Promotion                 | 23-Mar-2012 | Heilongjiang Patriotic Health Campaign Committee                                                                                                                                                                                                 | Standards for the Essential Public Health Service Package-2011 version                                                                                                                                                                                                                  |
| H7  | 黑龙江省人口发展“十二五”规划              | The Twelfth Five-Year Plan for Population Development Plan in Heilongjiang Province                                                       | 30-Sep-2012 | People's Government of Heilongjiang Province                                                                                                                                                                                                     | Twelfth Five-Year Plan for National Population Development                                                                                                                                                                                                                              |
| H8  | 黑龙江省基层中医药服务能力提升工程实施方案        | The Implementation Plan of the Traditional Chinese Medicine Capacity Building Project at the Grassroots Level in Heilongjiang Province    | 13-Mar-2013 | People's Government of Heilongjiang Province                                                                                                                                                                                                     | ①Opinions on the Traditional Chinese Medicine Capacity Building Project at the Grassroots level<br>②The Implementation Plan of the Traditional Chinese Medicine Capacity Building Project at the Grassroots Level                                                                       |
| H9  | 黑龙江省巩固完善基本药物制度和基层机构运行新机制实施方案 | The Implementation Plan on Improving the Essential Medicine System and the New Mechanism of Grassroots Operation in Heilongjiang Province | 31-Dec-2013 | People's Government of Heilongjiang Province                                                                                                                                                                                                     | Opinions of the General Office of the State Council on Improving the Essential Medicine System and the New Mechanism of Grassroots Operation                                                                                                                                            |
| H10 | 关于城市公立医院改革试点指导意见             | Guidelines on the pilot reform of urban public hospitals                                                                                  | 16-Sep-2014 | *Health Commission of Heilongjiang Province/*Establishment Committee of Heilongjiang Province/*Heilongjiang Development and Reform Commission/*Heilongjiang Human Resources and Social Security Bureau /*Finance Bureau of Heilongjiang Province | ①Recommendations by the CPC Central Committee and the State Council on Deepening the Reform of the Medical and Health Care System<br>②Notice of the State Council on Issuing the 12th Five-Year Plan for Deepening Health System<br>③Guidelines on the Pilot Reform of Public Hospitals |



|     |                    |                                                                                               |             |                                                                                                                                                                                                                                                                                                                                                                                                                                                                                                                                                                                                                    |                                                                  |
|-----|--------------------|-----------------------------------------------------------------------------------------------|-------------|--------------------------------------------------------------------------------------------------------------------------------------------------------------------------------------------------------------------------------------------------------------------------------------------------------------------------------------------------------------------------------------------------------------------------------------------------------------------------------------------------------------------------------------------------------------------------------------------------------------------|------------------------------------------------------------------|
|     |                    |                                                                                               |             | /*Price Supervision and Administration of Heilongjiang Province                                                                                                                                                                                                                                                                                                                                                                                                                                                                                                                                                    |                                                                  |
| H11 | 黑龙江省基本公共服务体系建设实施方案 | The Implementation Plan of Establishing Basic Public Service Systems in Heilongjiang Province | 22-Sep-2014 | *Heilongjiang Development and Reform Commission/*Education Department of Heilongjiang Province/*Heilongjiang Civil Administration Information Net /*Finance Bureau of Heilongjiang Province/*Heilongjiang Human Resources and Social Security Bureau/*Department of Housing and Urban-rural Development of Heilongjiang Province/*Department of Culture of Heilongjiang/*Health Commission of Heilongjiang Province/*Heilongjiang Provincial Food and Drug Administration/*Radio and Television Administration of Heilongjiang Province/*Heilongjiang Provincial Sports Bureau/*Heilongjiang Press and Publication | Twelfth Five-Year Plan for National Basic Public Service Systems |

|     |                            |                                                                                                                                              |             |                                                                                                                                                                                                                                                                                                                                                                         |                                                                                               |
|-----|----------------------------|----------------------------------------------------------------------------------------------------------------------------------------------|-------------|-------------------------------------------------------------------------------------------------------------------------------------------------------------------------------------------------------------------------------------------------------------------------------------------------------------------------------------------------------------------------|-----------------------------------------------------------------------------------------------|
|     |                            |                                                                                                                                              |             | Bureau/*Heilongjiang Federation of the Disabled                                                                                                                                                                                                                                                                                                                         |                                                                                               |
| H12 | 黑龙江省人民政府办公厅关于支持民办养老产业发展的意见 | Opinions of the General Office of the People's Government of Heilongjiang Province on Supporting the Development of Private Pension Industry | 17-Oct-2014 | People's Government of Heilongjiang Province                                                                                                                                                                                                                                                                                                                            | Opinions of the State Council on Accelerating the Development of the Elderly Service Industry |
| H13 | 关于进一步做好计划生育家庭特别扶助工作的实施意见   | Implementation Opinions on Further Improving the Work of Special Support for Planned Parenthood Families                                     | 23-Oct-2014 | *Health Commission of Heilongjiang Province/*Heilongjiang Civil Administration Information Net /*Finance Bureau of Heilongjiang Province/*Heilongjiang Human Resources and Social Security Bureau/*Department of Housing and Urban-rural Development of Heilongjiang Province /*Department of Justice of Heilongjiang Province/*Heilongjiang Federation of the Disabled | Notice on Further Improving the Work of Special Support for Planned Parenthood Families       |
| H14 | 黑龙江省医疗机构进一步改善医疗服务行动实施方案    | The Implementation Plan of Heilongjiang Province on Further Improvement of Medical Service Action in Medical Institutions                    | 10-Mar-2015 | *Health Commission of Heilongjiang Province/*Heilongjiang Provincial Administration of Traditional Chinese Medicine                                                                                                                                                                                                                                                     | Action Plan for Further Improvement of Medical Services                                       |

|     |                                        |                                                                                                                                                             |             |                                                                                             |                                                                                                                                                                                    |
|-----|----------------------------------------|-------------------------------------------------------------------------------------------------------------------------------------------------------------|-------------|---------------------------------------------------------------------------------------------|------------------------------------------------------------------------------------------------------------------------------------------------------------------------------------|
| H15 | 黑龙江省爱卫会关于进一步加强新时期爱国卫生工作的实施意见           | Opinions of the Heilongjiang Patriotic Health Campaign Committee on Further Strengthening Patriotic Health Work in the New Period                           | 7-May-2015  | Heilongjiang Patriotic Health Campaign Committee                                            | Opinions of the State Council on Further Strengthening Patriotic Health Work in the New Period                                                                                     |
| H16 | 黑龙江省深化医药卫生体制改革 2015 年重点工作任务            | the key Work Arrangements on Deeping the Reform of the Medical and Health System in Heilongjiang Province of 2015                                           | 10-Jun-2015 | Heilongjiang Provincial Leading Group for Deepening Reform of the Medical and Health System | Work summary in 2014 and key tasks in 2015 for Deepening the reform of the medical and health system                                                                               |
| H17 | 黑龙江省全面推开县级公立医院综合改革实施方案                 | The Implementation Plan on Promoting Comprehensive Reform of County-level Public Hospitals In Heilongjiang Province                                         | 24-Aug-2015 | People's Government of Heilongjiang Province                                                | Implementation Opinions of the General Office of the State Council on Promoting Comprehensive Reform of County-level Public Hospitals                                              |
| H18 | 黑龙江省人民政府办公厅关于促进中医药健康服务发展的实施意见          | Implementation Opinions of the General Office People's Government of Heilongjiang Province on Promoting the Development of Chinese Medicine Health Services | 20-Jan-2016 | People's Government of Heilongjiang Province                                                | Development Plan of Traditional Chinese Medicine Health Service (2015-2020)                                                                                                        |
| H19 | 关于促进黑龙江省社会办医加快发展若干措施                   | Several Measures to Promote the Accelerated Development of Social Medicine in Heilongjiang Province                                                         | 6-Feb-2016  | People's Government of Heilongjiang Province                                                | Notice on Several Policy Measures to Promote the Accelerated Development of Socially-Run                                                                                           |
| G2  | 关于建立全科医生制度的实施意见                        | Guiding Opinions on Establishing General Practitioner System                                                                                                | 20-Apr-2012 | People's Government of Guangdong Province                                                   | Guiding Opinions of the State Council on Establishing General Practitioner System                                                                                                  |
| G3  | 广东省老龄事业发展“十二五”规划                       | The Twelfth Five-Year Plan for the Development of Aging Affairs in Guangdong Province                                                                       | 26-Apr-2012 | People's Government of Guangdong Province                                                   | The Twelfth Five-Year Plan for the Development of China's Aging Affairs                                                                                                            |
| G4  | 转发卫生部办公厅关于落实 2012 年医改任务做好农村卫生服务有关工作的通知 | Forwarded Notice of the General Office of the Ministry of Health on the implementing 2012 healthcare reform tasks to improve rural health services          | 3-Aug-2012  | Guangdong Provincial Health Department                                                      | Notice of the General Office of the Ministry of Health on the implementing 2012 healthcare reform tasks to improve rural health services                                           |
| G5  | 广东省卫生事业发展“十二五”规划的通知                    | The Twelfth Five-Year Plan for the Development of Health Services in Guangdong Province                                                                     | 13-Jul-2012 | People's Government of Guangdong Province                                                   | Recommendations by the CPC Central Committee and the State Council on Deepening the Reform of the Medical and Health Care System                                                   |
| G6  | 广东省县级公立医院综合改革试点实施意见                    | The Implementation Plan on Comprehensive Reform of County-level Public Hospitals In Guangdong Province                                                      | 30-Oct-2012 | People's Government of Guangdong Province                                                   | ①Notice of the State Council on Issuing the 12th Five Year Plan for Deepening Health System Reform<br>②Opinions on the pilot comprehensive reform of county level public hospitals |

|    |                                |                                                                                    |             |                                                                                                                                                                                                                                                                                                                                                                                                                                                                                                                                                                                                                                                                                                                                                                                            |                                                                      |
|----|--------------------------------|------------------------------------------------------------------------------------|-------------|--------------------------------------------------------------------------------------------------------------------------------------------------------------------------------------------------------------------------------------------------------------------------------------------------------------------------------------------------------------------------------------------------------------------------------------------------------------------------------------------------------------------------------------------------------------------------------------------------------------------------------------------------------------------------------------------------------------------------------------------------------------------------------------------|----------------------------------------------------------------------|
| G7 | 广东省慢性非传染性疾病防治工作规划(2012-2015 年) | Chronic Disease Prevention and Control Work Plan in Guangdong Province (2012-2015) | 16-Nov-2012 | <div>*Guangdong Provincial Health Department/*Guangdong Provincial Development and Reform Commission/*Department of Education of Guangdong Province /*Department of Science and Technology of Guangdong Province /*Economic and Informatisation Commission of Guangdong Province/*Department of Civil Affairs of Guangdong Province /*Department of Finance of Guangdong Province/*Human Resources and Social Security Department of Guangdong Province /*Environmental Protection Department of Guangdong Province /*Department of Housing and Urban-rural Development of Guangdong Province /*Department of Agriculture and Rural Affairs of Guangdong Province/*Guangdong Provincial Department of Foreign Trade and Economic Cooperation/*Radio and Television Administration of</div> | China's Chronic Disease Prevention and Control Work Plan (2012-2015) |
|----|--------------------------------|------------------------------------------------------------------------------------|-------------|--------------------------------------------------------------------------------------------------------------------------------------------------------------------------------------------------------------------------------------------------------------------------------------------------------------------------------------------------------------------------------------------------------------------------------------------------------------------------------------------------------------------------------------------------------------------------------------------------------------------------------------------------------------------------------------------------------------------------------------------------------------------------------------------|----------------------------------------------------------------------|

|     |                                                    |                                                                                                                                                                                                                                |             |                                                                                                                                                                            |                                                                                                                                              |
|-----|----------------------------------------------------|--------------------------------------------------------------------------------------------------------------------------------------------------------------------------------------------------------------------------------|-------------|----------------------------------------------------------------------------------------------------------------------------------------------------------------------------|----------------------------------------------------------------------------------------------------------------------------------------------|
|     |                                                    |                                                                                                                                                                                                                                |             | Guangdong Province/*Guangdong Provincial Press and Publication Bureau/*Guangdong Provincial Sports Bureau/*Guangdong Provincial Food and Drug Administration               |                                                                                                                                              |
| G8  | 广东省“十二五”期间深化医药卫生体制改革实施方案                           | Notice on Issuing the 12th Five-Year Plan for Deepening Health System Reform in Guangdong Province                                                                                                                             | 29-Dec-2012 | People's Government of Guangdong Province                                                                                                                                  | Notice of the State Council on Issuing the 12th Five Year Plan for Deepening Health System Reform                                            |
| G9  | 广东省巩固完善基本药物制度和基层运行新机制实施方案                          | Opinions on Improving the Essential Medicine System and the New Mechanism of Grassroots Operation in Guangdong Province                                                                                                        | 5-Sep-2013  | People's Government of Guangdong Province                                                                                                                                  | Opinions of the General Office of the State Council on Improving the Essential Medicine System and the New Mechanism of Grassroots Operation |
| G10 | 广东省深化医药卫生体制改革近期工作要点                                | The main points of work of Guangdong Province on Deeping the Health System Reform in recent times                                                                                                                              | 22-Aug-2014 | People's Government of Guangdong Province                                                                                                                                  | Work summary in 2014 and key tasks in 2015 for Deepening the reform of the medical and health system                                         |
| G11 | 广东省推进中医预防保健服务体系建设工作方案                              | The Work Plan for Promoting the Construction of Chinese Medicine Preventive Healthcare Service System in Guangdong Province                                                                                                    | 9-Sep-2014  | Traditional Chinese Medicine Bureau Of Guangdong Province                                                                                                                  | Some Opinions of the State Council on Supporting and Promoting the Development of the Traditional Chinese Medicine Industry                  |
| G12 | 转发国家卫生计生委 财政部 国家中医药管理局关于做好 2014 年国家基本公共卫生服务项目工作的通知 | Notice on Implementing the National Essential Public Health Service Package in 2014 retrieved from National Health and Family Planning Commission Ministry of Finance State and Administration of Traditional Chinese Medicine | 20-Oct-2014 | *Health and Family Planning Commission of Guangdong Province<br>*Department of Finance of Guangdong Province<br>*Traditional Chinese Medicine Bureau Of Guangdong Province | Notice on Implementing the National Essential Public Health Service Package in 2014                                                          |
| G13 | 广东省人民政府办公厅关于大力发展商业健康保险的实施意见                        | Implementation Opinions of the General Office of the People's Government of Guangdong Province on Vigorously Developing Commercial Health Insurance                                                                            | 20-May-2015 | People's Government of Guangdong Province                                                                                                                                  | Opinions of the General Office of the State Council on Accelerating the Development of Commercial Health Insurance                           |

|                                  |                            |                                                                                                                           |             |                                                                                                                                                                                                                                                                                                                                                                                                                                                                                                                           |                                                                                                                                          |
|----------------------------------|----------------------------|---------------------------------------------------------------------------------------------------------------------------|-------------|---------------------------------------------------------------------------------------------------------------------------------------------------------------------------------------------------------------------------------------------------------------------------------------------------------------------------------------------------------------------------------------------------------------------------------------------------------------------------------------------------------------------------|------------------------------------------------------------------------------------------------------------------------------------------|
| G14                              | 广东省深化医药卫生体制改革近期<br>工作要点    | The main points of work of Guangdong Province on Deeping<br>the Health System Reform in recent times                      | 14-Jul-2015 | People's Government of<br>Guangdong Province                                                                                                                                                                                                                                                                                                                                                                                                                                                                              | Major Work Plans for Deepening the Reforms of the Medical and Health<br>System of 2014                                                   |
| G15                              | 广东省全面深化县级公立医院综合<br>改革的若干意见 | The Implementation Plan on Fully Deepening Comprehensive<br>Reform of County-level Public Hospitals In Guangdong Province | 11-Nov-2015 | People's Government of<br>Guangdong Province                                                                                                                                                                                                                                                                                                                                                                                                                                                                              | Implementation Opinions of the General Office of the State Council on<br>Promoting Comprehensive Reform of County-level Public Hospitals |
| G16                              | 广东省城市公立医院综合改革的实<br>施意见     | Implementation Opinions on the Comprehensive Reform of<br>Urban Public Hospitals in Guangdong Province                    | 11-Nov-2015 | People's Government of<br>Guangdong Province                                                                                                                                                                                                                                                                                                                                                                                                                                                                              | Guiding Opinions of the General Office of the State Council on the Pilot<br>Comprehensive Reform of Urban Public Hospitals               |
| 13th five-year plan (2016-2020 ) |                            |                                                                                                                           |             |                                                                                                                                                                                                                                                                                                                                                                                                                                                                                                                           |                                                                                                                                          |
| H20                              | 关于推进医疗卫生与养老服务相<br>结合实施意见   | Implementation Opinions on Promoting the Integration of<br>Medical Health and Elderly Services                            | 30-Mar-2016 | *Health Commission of<br>Heilongjiang<br>Province/*Heilongjiang Civil<br>Administration Information<br>Net/*Heilongjiang Human<br>Resources and Social Security<br>Bureau/*Heilongjiang<br>Development and Reform<br>Commission/*Department of<br>Industry and Information<br>Technology of Heilongjiang<br>Province/*Heilongjiang Province<br>Public Security Department<br>/*Finance Bureau of<br>Heilongjiang<br>Province/*State-owned Assets<br>Department of Heilongjiang<br>Province<br>/*Department of Housing and | Guiding Opinions on Promoting the Integration of Medical Health and<br>Elderly Services                                                  |

|     |                              |                                                                                                                                                                   |             |                                                                                                                                                                                           |                                                                                                                           |
|-----|------------------------------|-------------------------------------------------------------------------------------------------------------------------------------------------------------------|-------------|-------------------------------------------------------------------------------------------------------------------------------------------------------------------------------------------|---------------------------------------------------------------------------------------------------------------------------|
|     |                              |                                                                                                                                                                   |             | Urban-rural Development of Heilongjiang Province/*Department of Tourism of Heilongjiang /*Heilongjiang Provincial Working Committee on Aging People's Government of Heilongjiang Province |                                                                                                                           |
| H21 | 黑龙江省深化医药卫生体制改革2016年重点工作任务    | The key Work Arrangements on Deeping the Reform of the Medical and Health System in Heilongjiang Province of 2016                                                 | 14-Jul-2016 | People's Government of Heilongjiang Province                                                                                                                                              | Major Work Plans for Deepening the Reforms of the Medical and Health System of 2016                                       |
| H22 | 黑龙江省人民政府办公厅关于促进医药产业健康发展的实施意见 | Implementation Opinions of the General Office of People's Government of Heilongjiang Province on Promoting the Healthy Development of the Pharmaceutical Industry | 30-Sep-2016 | People's Government of Heilongjiang Province                                                                                                                                              | Guidelines of the General Office of the State Council on Promoting the Healthy Development of the Pharmaceutical Industry |
| H23 | 黑龙江省医疗卫生服务体系规划 (2016—2020年)  | Heilongjiang Provincial Healthcare Service System Planning (2016-2020)                                                                                            | 13-Oct-2016 | People's Government of Heilongjiang Province                                                                                                                                              | National Medical and Health Service System Planning Outline (2015-2020)                                                   |
| H24 | 黑龙江省民政事业“十三五”发展规划            | The Thirteenth Five-Year Plan for the Development of Civil Affairs in Heilongjiang Province                                                                       | 3-Nov-2016  | Heilongjiang Civil Administration Information Net                                                                                                                                         | Thirteenth Five-Year Plan for the Development of Civil Affairs                                                            |
| H25 | 黑龙江省全民健身实施计划 (2016-2020年)    | The National Fitness Implementation Plan of Heilongjiang Province (2016-2020)                                                                                     | 5-Dec-2016  | People's Government of Heilongjiang Province                                                                                                                                              | National Fitness Program (2016-2020)                                                                                      |
| H26 | 黑龙江省中医药发展“十三五”规划             | The Thirteenth Five-Year Plan for the Development of Chinese Medicine Industry in Heilongjiang Province                                                           | 11-Jan-2017 | People's Government of Heilongjiang Province                                                                                                                                              | Outline of the Strategic Plan for the Development of Traditional Chinese Medicine (2016-2030)                             |
| H27 | 2017年全省中医药工作要点               | The key department on Chinese Medicine work in Heilongjiang Province of 2017                                                                                      | 17-Feb-2017 | Heilongjiang Provincial Administration of Traditional Chinese Medicine                                                                                                                    | Outline of the Strategic Plan for the Development of Traditional Chinese Medicine (2016-2030)                             |

|     |                                   |                                                                                                                                                         |             |                                                                                                                                                                                                                                                                                                                                                                                                            |                                                                                                                                                                                                                                                                           |
|-----|-----------------------------------|---------------------------------------------------------------------------------------------------------------------------------------------------------|-------------|------------------------------------------------------------------------------------------------------------------------------------------------------------------------------------------------------------------------------------------------------------------------------------------------------------------------------------------------------------------------------------------------------------|---------------------------------------------------------------------------------------------------------------------------------------------------------------------------------------------------------------------------------------------------------------------------|
| H28 | 关于深入推进 2017 年进一步改善医疗服务行动计划重点工作的通知 | Notice on Further Promoting the Priorities of the 2017 Action Plan for Further Improvement of Medical Services                                          | 31-Mar-2017 | *Health Commission of Heilongjiang Province<br>*Heilongjiang Provincial Administration of Traditional Chinese Medicine                                                                                                                                                                                                                                                                                     | ①Action Plan for Further Improvement of Medical Services<br>②Programme of key work for the in-depth implementation of the Action Plan for Further Improvement of Medical Services in 2017                                                                                 |
| H29 | 关于建立城乡居民基本医疗保险制度的指导意见             | Guiding Opinions on the Establishment of the Basic Medical Insurance System for Urban and Rural Residents                                               | 21-Apr-2017 | *Heilongjiang Human Resources and Social Security Bureau<br>*Finance Bureau of Heilongjiang Province<br>*Heilongjiang Civil Administration Information Net<br>*Audit Office of Heilongjiang<br>*Education Department of Heilongjiang Province<br>*Heilongjiang Provincial Leading Group of Poverty Alleviation and Development<br>*Heilongjiang Regulatory Bureau of China Insurance Regulatory Commission | Opinions of the State Council on Integrating the Basic Medical Insurance System for Urban and Rural Residents                                                                                                                                                             |
| H30 | 黑龙江省慢性病综合防控示范区建设实施方案（试行）          | The trial Implementation plan for the construction of model areas for comprehensive prevention and control of chronic diseases in Heilongjiang Province | 1-Jun-2017  | Health Commission of Heilongjiang Province                                                                                                                                                                                                                                                                                                                                                                 | ①Thirteenth Five-Year Medicine and Health Plan<br>②China's mid- and long-term plan for the prevention and treatment of chronic diseases (2017-2025)<br>③National Chronic Disease Comprehensive Prevention and Control Demonstration Zone Construction Management Measures |



|     |                                     |                                                                                                                                                                                         |             |                                                                                                                            |                                                                                                                                                                                      |
|-----|-------------------------------------|-----------------------------------------------------------------------------------------------------------------------------------------------------------------------------------------|-------------|----------------------------------------------------------------------------------------------------------------------------|--------------------------------------------------------------------------------------------------------------------------------------------------------------------------------------|
| H31 | 黑龙江省人民政府办公厅关于推进医疗联合体建设和发展的实施意见      | Guiding Opinions of the General Office of People's Government of Heilongjiang Province on Promoting the Establishment and Development of Medical Alliance Systems                       | 30-Jun-2017 | People's Government of Heilongjiang Province                                                                               | Guiding Opinions of the General Office of the State Council on Promoting the Establishment and Development of Medical Alliance Systems                                               |
| H32 | 黑龙江省深化医药卫生体制改革2017年重点工作任务           | The key Work Arrangements on Deepening the Reform of the Medical and Health System in Heilongjiang Province of 2017                                                                     | 14-Jul-2017 | People's Government of Heilongjiang Province                                                                               | Major Work Plans for Deepening the Reforms of the Medical and Health System of 2017                                                                                                  |
| H33 | 黑龙江省“十三五”促进民族地区和人口较少民族发展规划          | The 13th Five-Year Plan for Promoting the Development of ethnic regions and ethnic groups with a small population in Heilongjiang Province                                              | 1-Aug-2017  | People's Government of Heilongjiang Province                                                                               | The 13th Five-Year Plan for Promoting the Development of ethnic regions and ethnic groups with a small population                                                                    |
| H34 | 在我省建档立卡农村贫困人口中加强慢病签约和有关公共卫生服务的实施方案  | The Implementation Plan on Strengthening the Contracting of Chronic Disease and Related Public Health Services among the Rural Poor People with Recorded Cards in Heilongjiang Province | 27-Nov-2017 | Health Commission of Heilongjiang Province<br>Heilongjiang Provincial Leading Group of Poverty Alleviation and Development | Notice on Implementing the Contracting Services for Chronic Disease Family Doctors of Poor Populations                                                                               |
| H35 | 黑龙江省防治慢性病中长期规划（2017—2025年）          | Mid- and long-term plan for the prevention and treatment of chronic diseases in Heilongjiang Province (2017-2025)                                                                       | 28-Nov-2017 | People's Government of Heilongjiang Province                                                                               | China's mid- and long-term plan for the prevention and treatment of chronic diseases (2017-2025)                                                                                     |
| H36 | 黑龙江省人民政府办公厅关于进一步深化基本医疗保险支付方式改革的实施意见 | Implementation Opinions of the General Office of the People's Government of Heilongjiang Province on Further Deepening the Reform of Basic Medical Insurance Payment Methods            | 28-Dec-2017 | People's Government of Heilongjiang Province                                                                               | Guidelines of the General Office of the State Council on Further Deepening the Reform of Basic Medical Insurance Payment Methods                                                     |
| H37 | 黑龙江省支持社会力量提供多层次多样化医疗服务发展健康产业实施方案    | The Implementation Plan on supporting social forces to provide multilevel and diversified medical services to develop the health industry in Heilongjiang Province                      | 31-Dec-2017 | People's Government of Heilongjiang Province                                                                               | The Implementation Plan of the General Office of the State Council on supporting social forces to provide multilevel and diversified medical services to develop the health industry |
| H38 | 黑龙江省国民营养计划（2017—2030年）              | National Nutrition Programme of Heilongjiang Province (2017-2030)                                                                                                                       | 30-May-2018 | People's Government of Heilongjiang Province                                                                               | National Nutrition Plan (2017-2030)                                                                                                                                                  |

|     |                                  |                                                                                                           |             |                                                                                                                                                                                                                                                                                                                                                                                                                                                                                                                                                                                                        |                                                                                                    |
|-----|----------------------------------|-----------------------------------------------------------------------------------------------------------|-------------|--------------------------------------------------------------------------------------------------------------------------------------------------------------------------------------------------------------------------------------------------------------------------------------------------------------------------------------------------------------------------------------------------------------------------------------------------------------------------------------------------------------------------------------------------------------------------------------------------------|----------------------------------------------------------------------------------------------------|
| H39 | 关于进一步做好农村贫困人口慢病签约服务工作的通知         | Notice on Further Implementing the Contracting Services for Chronic Diseases of the Rural Poor Population | 26-Jul-2018 | Health Commission of Heilongjiang Province                                                                                                                                                                                                                                                                                                                                                                                                                                                                                                                                                             | Work plan for family doctors contracting services with chronic diseases for documented poor people |
| H40 | 黑龙江省健康老龄化行动计划<br>( 2018—2020 年 ) | Action Plan for Healthy Ageing in Heilongjiang Province<br>(2018-2020)                                    | 5-Dec-2018  | *Health Commission of Heilongjiang Province<br>*Heilongjiang Development and Reform Commission<br>*Education Department of Heilongjiang Province<br>*Department of Industry and Information Technology of Heilongjiang Province<br>*Heilongjiang Civil Administration Information Net<br>*Finance Bureau of Heilongjiang Province<br>*Heilongjiang Human Resources and Social Security Bureau<br>*Department of Natural Resources of Heilongjiang<br>*Department of Housing and Urban-rural Development of Heilongjiang Province<br>*Heilongjiang Provincial Sports Bureau<br>*Heilongjiang Provincial | ①National Nutrition Plan (2017-2030)<br>②Thirteenth Five-Year Plan on Healthy Ageing               |

|     |                                  |                                                                                                                                                               |             |                                                                                                                                                                                                                                                                                                                                                               |                                                                                                                                       |
|-----|----------------------------------|---------------------------------------------------------------------------------------------------------------------------------------------------------------|-------------|---------------------------------------------------------------------------------------------------------------------------------------------------------------------------------------------------------------------------------------------------------------------------------------------------------------------------------------------------------------|---------------------------------------------------------------------------------------------------------------------------------------|
|     |                                  |                                                                                                                                                               |             | Administration of Traditional Chinese Medicine<br>*Heilongjiang Province<br>Healthcare Security Administration<br>*Department of Science and Technology of Heilongjiang Province<br>*Department of Culture and Tourism of Heilongjiang Province<br>*Administration for Market regulation of Heilongjiang Province<br>*Heilongjiang Federation of the Disabled |                                                                                                                                       |
| H41 | 黑龙江省推进分级诊疗制度建设实施方案               | The Implementation Plan of Heilongjiang Province on Promoting the Establishment of a Tiered Diagnosis and Treatment System                                    | 31-Jan-2019 | People's Government of Heilongjiang Province                                                                                                                                                                                                                                                                                                                  | Guiding Opinions of the General Office of the State Council on Promoting the Establishment of a Tiered Diagnosis and Treatment System |
| H42 | 黑龙江省卫生健康委关于做好2019 年家庭医生签约服务工作的通知 | Notice of the Health Commission of Heilongjiang Province on Implementing the Contracting Services for Family Doctors in 2019                                  | 15-May-2019 | Health Commission of Heilongjiang Province                                                                                                                                                                                                                                                                                                                    | Notice of the General Office of the National Health Commission on Family Doctor Contracting Services in 2019                          |
| H43 | 黑龙江省卫生健康委等十一部门关于完善国家基本药物制度的实施意见  | The Implementation Opinions of the Heilongjiang Provincial Health Commission and Eleven Other Departments on Improving the National Essential Medicine System | 2019-06-04  | *Health Commission of Heilongjiang Province<br>*Department of Science and Technology of Heilongjiang Province                                                                                                                                                                                                                                                 | Opinions of the General Office of the State Council on Improving the National Basic Drug System                                       |

|     |                                       |                                                                                                                                                                |            |                                                                                                                                                                                                                                                                                                                                                                                                                                                                                                                                                                                                                                       |                                                                                                                  |
|-----|---------------------------------------|----------------------------------------------------------------------------------------------------------------------------------------------------------------|------------|---------------------------------------------------------------------------------------------------------------------------------------------------------------------------------------------------------------------------------------------------------------------------------------------------------------------------------------------------------------------------------------------------------------------------------------------------------------------------------------------------------------------------------------------------------------------------------------------------------------------------------------|------------------------------------------------------------------------------------------------------------------|
|     |                                       |                                                                                                                                                                |            | <div><div>*Department of Industry and Information Technology of Heilongjiang Province</div><div>*Finance Bureau of Heilongjiang Province</div><div>*Heilongjiang Province Department of Commerce</div><div>*Administration for Market regulation of Heilongjiang Province</div><div>*Radio and Television Administration of Heilongjiang Province</div><div>*Heilongjiang Province Healthcare Security Administration</div><div>*Heilongjiang Provincial Administration of *Traditional Chinese Medicine</div><div>Heilongjiang Provincial Drug Administration</div><div>*Public Resources Trading Center of Heilongjiang</div></div> |                                                                                                                  |
| H44 | 黑龙江省人民政府办公厅关于发展“互联网+医疗”促进“看病不求人”的实施意见 | The Implementation Opinions of the General Office of the People's Government of Heilongjiang Province on Promoting the Development of "Internet + Medical " to | 8-Jul-2019 | People's Government of Heilongjiang Province                                                                                                                                                                                                                                                                                                                                                                                                                                                                                                                                                                                          | Opinions of the General Office of the State Council on Promoting the Development of "Internet + Medical " Health |

|     |                                           |                                                                                                                                                                                                                                                            |             |                                                                                                                                 |                                                                                                                                                                                                                                                                         |
|-----|-------------------------------------------|------------------------------------------------------------------------------------------------------------------------------------------------------------------------------------------------------------------------------------------------------------|-------------|---------------------------------------------------------------------------------------------------------------------------------|-------------------------------------------------------------------------------------------------------------------------------------------------------------------------------------------------------------------------------------------------------------------------|
|     |                                           | access to health care"                                                                                                                                                                                                                                     |             |                                                                                                                                 |                                                                                                                                                                                                                                                                         |
| H45 | 关于做好 2019 年城乡 居民基本医<br>疗保障工作的通知           | Notice on Implementing the Basic Health Insurance Schemes<br>for Urban and Rural Residents in 2019                                                                                                                                                         | 17-Jul-2019 | *Heilongjiang Province<br>Healthcare Security<br>Administration<br>*Finance Bureau of Heilongjiang<br>Province                  | Notice on Implementing the Basic Health Insurance Schemes for Urban<br>and Rural Residents in 2019                                                                                                                                                                      |
| H46 | 关于进一步加强短缺药品监测预<br>警与统筹应对工作的通知             | Notice on Further Strengthening the Monitoring, Early<br>Warning and Coordinated Response to the Shortages of<br>Medicines                                                                                                                                 | 23-Dec-2019 | *Health Commission of<br>Heilongjiang Province<br>*Heilongjiang Provincial<br>Administration of Traditional<br>Chinese Medicine | Opinions of the General Office of the State Council on Further Improving<br>the Work of Guaranteeing the Supply and Stabilising the Price of Shortage<br>Drugs                                                                                                          |
| H47 | 健康龙江行动( 2019—2030 年 )实<br>施方案             | The Implementation Plan of the Healthy Longjiang<br>Action(2019-2030)                                                                                                                                                                                      | 31-Dec-2019 | People's Government of<br>Heilongjiang Province                                                                                 | Opinions of the State Council on Implementing the Healthy China Action                                                                                                                                                                                                  |
| H48 | 黑龙江省人民政府办公厅关于推<br>进养老服务发展的实施意见            | Implementation Opinions of the General Office of People's<br>Government of Heilongjiang Province on Promoting the<br>Development of Elderly Services                                                                                                       | 9-May-2020  | People's Government of<br>Heilongjiang Province                                                                                 | ①Opinions of the State Council on promoting the Development of the<br>Elderly Service Industry<br>②Implementation Opinions of the Ministry of Civil Affairs on Further<br>Expanding the Supply of Elderly Services and Promoting the Consumption<br>of Elderly Services |
| H49 | 中共黑龙江省委黑龙江省人民政<br>府关于促进中医药传承创新发展<br>的实施意见 | The Implementation Opinions of the Heilongjiang Provincial<br>Committee of the Communist Party of China and People's<br>Government of Heilongjiang Province on Promoting the<br>Inheritance, Innovation and Development of Traditional<br>Chinese Medicine | 1-Jun-2020  | People's Government of<br>Heilongjiang Province                                                                                 | Opinions of the Central Committee of the Communist Party of China and<br>the State Council on Promoting the Inheritance, Innovation and<br>Development of Traditional Chinese Medicine                                                                                  |

|     |                   |                                                                                                      |            |                                                                                                                                                                                                                                                                                                                                                                                                                                                                                                                                                                                                                                                                                                                                                                                             |                                                                                 |
|-----|-------------------|------------------------------------------------------------------------------------------------------|------------|---------------------------------------------------------------------------------------------------------------------------------------------------------------------------------------------------------------------------------------------------------------------------------------------------------------------------------------------------------------------------------------------------------------------------------------------------------------------------------------------------------------------------------------------------------------------------------------------------------------------------------------------------------------------------------------------------------------------------------------------------------------------------------------------|---------------------------------------------------------------------------------|
| H50 | 关于深入推进医养结合发展的实施意见 | Implementation Opinions on Further Promoting the Development of Medical and Nursing Care Integration | 1-Jun-2020 | <div>*Health Commission of Heilongjiang Province</div> <div>*Heilongjiang Civil Administration Information Net</div> <div>*Heilongjiang Development and Reform Commission</div> <div>*Education Department of Heilongjiang Province</div> <div>*Finance Bureau of Heilongjiang Province</div> <div>*Heilongjiang Human Resources and Social Security Bureau</div> <div>*Department of Nutural Resources of Heilongjiang</div> <div>*Department of Housing and Urban-rural Development of Heilongjiang Province</div> <div>*Administration for Market regulation of Heilongjiang Province/*Heilongjiang Province Healthcare Security Administration/*Department of Industry and Information Technology of Heilongjiang Province/*Heilongjiang Provincial Administration of Traditional</div> | Several Opinions on Further Promoting the Development of Healthcare Integration |
|-----|-------------------|------------------------------------------------------------------------------------------------------|------------|---------------------------------------------------------------------------------------------------------------------------------------------------------------------------------------------------------------------------------------------------------------------------------------------------------------------------------------------------------------------------------------------------------------------------------------------------------------------------------------------------------------------------------------------------------------------------------------------------------------------------------------------------------------------------------------------------------------------------------------------------------------------------------------------|---------------------------------------------------------------------------------|

|     |                                |                                                                                                                                      |             |                                                                                                                                                                                                                        |                                                                                                                                       |
|-----|--------------------------------|--------------------------------------------------------------------------------------------------------------------------------------|-------------|------------------------------------------------------------------------------------------------------------------------------------------------------------------------------------------------------------------------|---------------------------------------------------------------------------------------------------------------------------------------|
|     |                                |                                                                                                                                      |             | Chinese Medicine                                                                                                                                                                                                       |                                                                                                                                       |
| H51 | 关于进一步规范医疗机构与养老机构签约合作的实施意见      | Implementation Opinions on Further Regulating the Contractual Cooperation between Medical Institutions and elderly care institutions | 16-Jun-2020 | *Health Commission of Heilongjiang Province<br>/*Heilongjiang Civil Administration Information Net<br>/*Heilongjiang Provincial Administration of Traditional Chinese Medicine                                         | Several Opinions on Further Promoting the Development of Healthcare Integration                                                       |
| H52 | 关于做好 2020 年城乡居民基本医疗保障工作的通知     | Notice on Implementing the Basic Health Insurance Schemes for Urban and Rural Residents in 2020                                      | 28-Aug-2020 | *Heilongjiang Province Healthcare Security Administration/*Finance Bureauo of Heilongjiang Province/*Heilongjiang Provincial Tax Service, State Taxation Administration/*Education Department of Heilongjiang Province | Notice on Implementing the Basic Health Insurance Schemes for Urban and Rural Residents in 2020                                       |
| H53 | 黑龙江省合理膳食行动省部合作项目实施方案           | Implementation Programme of the Provincial-Ministerial Cooperation Project on Reasonable Dietary Action in Heilongjiang Province     | 16-Oct-2020 | People's Government of Heilongjiang Province                                                                                                                                                                           | "Healthy China 2030" blueprint                                                                                                        |
| G17 | 广东省加快推进分级诊疗制度建设实施方案            | The Implementation Plan on Accelerating the Establishment of a Tiered Diagnosis and Treatment System in Guangdong Province           | 16-May-2016 | People's Government of Guangdong Province                                                                                                                                                                              | Guiding Opinions of the General Office of the State Council on Promoting the Establishment of a Tiered Diagnosis and Treatment System |
| G18 | 广东省中医药健康服务发展规划 ( 2016-2020 年 ) | Development Plan of Traditional Chinese Medicine Health Service in Guangdong Province(2016-2020)                                     | 30-Jun-2016 | People's Government of Guangdong Province                                                                                                                                                                              | Development Plan of Traditional Chinese Medicine Health Service (2015-2020)                                                           |

|     |                                 |                                                                                                                                                             |             |                                                                                                                                                                                                                                                                                                      |                                                                                                                           |
|-----|---------------------------------|-------------------------------------------------------------------------------------------------------------------------------------------------------------|-------------|------------------------------------------------------------------------------------------------------------------------------------------------------------------------------------------------------------------------------------------------------------------------------------------------------|---------------------------------------------------------------------------------------------------------------------------|
| G19 | 广东省人民政府办公厅关于促进医疗卫生与养老服务相结合的实施意见 | Guiding Opinions of the General Office of the People's Government of Guangdong Province on Promoting the Integration of Medical Health and Elderly Services | 12-Jul-2016 | People's Government of Guangdong Province                                                                                                                                                                                                                                                            | Guiding Opinions on Promoting the Integration of Medical Health and Elderly Services                                      |
| G20 | 广东省促进医药产业健康发展实施方案               | The Implementation Plan on Promoting the Healthy Development of the Pharmaceutical Industry in Guangdong Province                                           | 14-Sep-2016 | People's Government of Guangdong Province                                                                                                                                                                                                                                                            | Guidelines of the General Office of the State Council on Promoting the Healthy Development of the Pharmaceutical Industry |
| G21 | 关于控制公立医院医疗费用不合理增长的实施方案          | The Implementation Plan on Controlling Unreasonable Increases in Medical Expenses in Public Hospitals                                                       | 18-Sep-2016 | *Health and Family Planning Commission of Guangdong Province/*Guangdong Provincial Development and Reform Commission/*Department of Finance of Guangdong Province /*Human Resources and Social Security Department of Guangdong Province/*Traditionaal Chinese Medicine Bureau of Guangdong Province | Opinions on Controlling Unreasonable Increases in Medical Expenses in Public Hospitals                                    |
| G22 | 广东省加快推进家庭医生签约服务制度的实施方案          | The Implementation Plan on Accelerating the promotion of Contracted Services System of Family Doctors in Guangdong Province                                 | 28-Oct-2016 | *Medical Reform Office of Guangdong Province/*Health and Family Planning Commission of Guangdong Province/*Guangdong Provincial Development and Reform Commission/*Department of Civil Affairs of Guangdong Province/*Department of Finance of Guangdong Province/*Human                             | Guiding Opinions on Promoting Contracted Services of Family Doctors                                                       |



|     |                                           |                                                                                                                                                                                      |             |                                                                                                                                                                                  |                                                                                                                                                             |
|-----|-------------------------------------------|--------------------------------------------------------------------------------------------------------------------------------------------------------------------------------------|-------------|----------------------------------------------------------------------------------------------------------------------------------------------------------------------------------|-------------------------------------------------------------------------------------------------------------------------------------------------------------|
|     |                                           |                                                                                                                                                                                      |             | Resources and Social Security<br>/*Department of Guangdong<br>Province/*Traditional Chinese<br>Medicine Bureau of Guangdong<br>Province/*Guangdong Federation of<br>the Disabled |                                                                                                                                                             |
| G23 | 关于开展健康城市健康村镇建设的<br>实施意见                   | The Implementation Plan on the Development of Healthy Cities<br>and Healthy Villages and Towns                                                                                       | 1-Dec-2016  | Guangdong Patriotic Health<br>Campaign Committee                                                                                                                                 | Guiding Opinions on the Development of Healthy Cities and Healthy Villages<br>and Towns                                                                     |
| G24 | 广东省贯彻《中医药发展战略规划纲<br>要（2016-2030年）》实施方案    | The Implementation Plan on Outline of the Strategic Plan for the<br>Development of Traditional Chinese Medicine (2016-2030) in<br>Guangdong Province                                 | 30-Dec-2016 | People's Government of<br>Guangdong Province                                                                                                                                     | Outline of the Strategic Plan for the Development of Traditional Chinese<br>Medicine (2016-2030)                                                            |
| G25 | 广东省人民政府办公厅关于促进和<br>规范健康医疗大数据应用发展的实<br>施意见 | The Implementation Plan of the General Office of the People's<br>Government of Guangdong Province on Promoting and<br>Regulating the Development of Healthcare Big Data Applications | 8-Feb-2017  | People's Government of<br>Guangdong Province                                                                                                                                     | Guiding Opinions of the General Office of the State Council on Promoting and<br>Regulating the Development of Healthcare Big Data Applications              |
| G26 | 广东省“十三五”深化医药卫生体制<br>改革规划                  | The "13th Five-Year Plan" for deepening the reform of the<br>medical and health system in Guangdong Province                                                                         | 12-May-2017 | People's Government of<br>Guangdong Province                                                                                                                                     | The "13th Five-Year Plan" for deepening the reform of the medical and health<br>system                                                                      |
| G27 | 广东省推进医疗联合体建设和发展<br>的实施方案                  | The Implementation Plan on Promoting the Establishment and<br>Development of Medical Alliance Systems in Guangdong<br>Province                                                       | 30-Jun-2017 | People's Government of<br>Guangdong Province                                                                                                                                     | Guiding Opinions of the General Office of the State Council on Promoting<br>the Establishment and Development of Medical Alliance Systems                   |
| G28 | 广东省防治慢性病中长期规划（2017<br>- 2025年）            | Mid- and long-term plan for the prevention and treatment of<br>chronic diseases in Guangdong Province (2017-2025)                                                                    | 30-Jun-2017 | People's Government of<br>Guangdong Province                                                                                                                                     | China's mid- and long-term plan for the prevention and treatment of chronic<br>diseases (2017-2025)                                                         |
| G29 | 广东省进一步改革完善药品生产流<br>通使用政策实施方案              | The Implementation Plan on Further Reform and Improvement of<br>Policies on the Production and Circulation of Medicines in<br>Guangdong Province                                     | 14-Jul-2017 | People's Government of<br>Guangdong Province                                                                                                                                     | Several Opinions of the General Office of the State Council on Further Reform<br>and Improvement of Policies on the Production and Circulation of Medicines |

|     |                                |                                                                                                                                             |             |                                                                                                                                                                                                                                                                                                                                                                                                                        |                                                                                                          |
|-----|--------------------------------|---------------------------------------------------------------------------------------------------------------------------------------------|-------------|------------------------------------------------------------------------------------------------------------------------------------------------------------------------------------------------------------------------------------------------------------------------------------------------------------------------------------------------------------------------------------------------------------------------|----------------------------------------------------------------------------------------------------------|
| G30 | 广东省促进老龄事业发展和养老体系建设实施方案         | The Implementation Plan on promoting the development of Aging Affairs Development and the construction of Pension System Establishment Plan | 3-Aug-2017  | People's Government of Guangdong Province                                                                                                                                                                                                                                                                                                                                                                              | "Thirteenth Five-Year Plan" for National Aging Affairs Development and Pension System Establishment Plan |
| G31 | “十三五”广东省健康促进与教育工作规划            | "Thirteenth Five-Year Plan" of Guangdong Province for Health Promotion and Education Work                                                   | 21-Aug-2017 | Health and Family Planning Commission of Guangdong Province                                                                                                                                                                                                                                                                                                                                                            | "Thirteenth Five-Year Plan" for National Health Promotion and Education Work                             |
| G32 | 转发关于做好 2017 年国家基本公共卫生服务项目工作的通知 | Forwarded Notice on Implementing the National Essential Public Health Service Package in 2017                                               | 28-Sep-2017 | *Health and Family Planning Commission of Guangdong Province / *Department of Finance of Guangdong Province / *Traditional Chinese Medicine Bureau of Guangdong Province                                                                                                                                                                                                                                               | Notice on Implementing the National Essential Public Health Service Package in 2017                      |
| G33 | 广东省改革完善短缺药品供应保障机制实施方案          | The Implementation Plan on Reforming and Improving the Mechanism for Shortage Drug Supply Guarantee                                         | 16-Nov-2017 | *Health and Family Planning Commission of Guangdong Province / *Guangdong Provincial Development and Reform Commission / *Economic and Informatisation Commission of Guangdong Province / *Department of Finance of Guangdong Province / *Human Resources and Social Security / *Department of Guangdong Province / *Department of Commerce of Guangdong Province / *State-owned Assets Supervision and Administration | Implementation Opinions on Reforming and Improving the Mechanism for Shortage Drug Supply Guarantee      |

|     |                                |                                                                                                                                                   |             |                                                                                                                                                                                                                                                                                                                                                                                                                                                                                                     |                                                                                                                                  |
|-----|--------------------------------|---------------------------------------------------------------------------------------------------------------------------------------------------|-------------|-----------------------------------------------------------------------------------------------------------------------------------------------------------------------------------------------------------------------------------------------------------------------------------------------------------------------------------------------------------------------------------------------------------------------------------------------------------------------------------------------------|----------------------------------------------------------------------------------------------------------------------------------|
|     |                                |                                                                                                                                                   |             | Commission/*Industry and<br>Commerce Administration of<br>Guangdong Province/*Guangdong<br>Provincial Food and Drug<br>Administration                                                                                                                                                                                                                                                                                                                                                               |                                                                                                                                  |
| G34 | 广东省进一步深化基本医疗保险支付方式改革实施方案       | The Implementation Plan of the General Office of on Further Deepening the Reform of Basic Medical Insurance Payment Methods in Guangdong Province | 17-Nov-2017 | People's Government of<br>Guangdong Province                                                                                                                                                                                                                                                                                                                                                                                                                                                        | Guidelines of the General Office of the State Council on Further Deepening the Reform of Basic Medical Insurance Payment Methods |
| G35 | 广东省国民营养计划 ( 2017—2030 年 ) 实施方案 | National Nutrition Plan in Guangdong Province(2017-2030)                                                                                          | 5-Dec-2017  | *People's Government of<br>Guangdong Province                                                                                                                                                                                                                                                                                                                                                                                                                                                       | National Nutrition Plan (2017-2030)                                                                                              |
| G36 | 广东省“十三五”健康老龄化规划                | Thirteenth Five-Year Plan on Healthy Ageing in Guangdong Province                                                                                 | 25-Dec-2017 | *Health and Family Planning<br>Commission of Guangdong<br>Province/*Guangdong Provincial<br>Development and Reform<br>Commision/*Economic and<br>Informatisation Commission of<br>Guangdong Province/*Department<br>of Education of Guangdong<br>Province/*Department of Civil<br>Affairs of Guangdong Province<br>/*Department of Finance of<br>Guangdong Province<br>/*Human Resources and Social<br>Security/*Department of Guangdong<br>Province/*State-owned Assets<br>Department of Guangdong | Thirteenth Five-Year Plan on Healthy Ageing                                                                                      |

|     |                                         |                                                                                                                                                                                                             |             |                                                                                                                                                                                                                                                                          |                                                                                                                                                                   |
|-----|-----------------------------------------|-------------------------------------------------------------------------------------------------------------------------------------------------------------------------------------------------------------|-------------|--------------------------------------------------------------------------------------------------------------------------------------------------------------------------------------------------------------------------------------------------------------------------|-------------------------------------------------------------------------------------------------------------------------------------------------------------------|
|     |                                         |                                                                                                                                                                                                             |             | Province/*epartment of Housing and Urban-rural/*Development of Guangdong Province/*Guangdong Provincial Sports Bureau /*Traditional Chinese Medicine Bureau of Guangdong Province /*Guangdong Federation of the Disabled/*uangdong Provincial Working Committee on Aging |                                                                                                                                                                   |
| G37 | 广东省支持社会力量提供多层次多样化医疗服务的实施方案              | The Implementation Plan of the General Office of the State Council on supporting social forces to provide multilevel and diversified medical services to develop health industry                            | 16-Jan-2018 | People's Government of Guangdong Province                                                                                                                                                                                                                                | Opinions of the General Office of the State Council on supporting social forces to provide multilevel and diversified medical services to develop health industry |
| G38 | 广东省人口发展规划( 2017-2030 年 )                | Population Development Plan of Guangdong Province(2017-2030)                                                                                                                                                | 22-Feb-2018 | People's Government of Guangdong Province                                                                                                                                                                                                                                | National Population Development Plan (2016-2030)                                                                                                                  |
| G39 | 广东省促进“互联网+医疗健康”发展行动计划 ( 2018-2020 年 )   | action plan of Guangdong Province on Promoting the Development of "Internet + Medical " Health                                                                                                              | 5-Jun-2018  | People's Government of Guangdong Province                                                                                                                                                                                                                                | Opinions of the General Office of the State Council on Promoting the Development of "Internet + Medical " Health                                                  |
| G40 | 广东省卫生和计划生育委员会关于卫生计生新时期精准扶贫精准脱贫三年攻坚的实施方案 | The Implementation Plan of Guangdong Provincial Health and Family Planning Commission for the three-year program on precision poverty alleviation and poverty eradication in the new era of health planning | 3-Apr-2021  | Health and Family Planning Commission of Guangdong Province                                                                                                                                                                                                              | Guidelines on the Implementation of Health Poverty Alleviation Project                                                                                            |
| G41 | 广东省深化医药卫生体制改革近期重点工作任务                   | The Major Work Plans for Promoting the Construction of Chinese Medicine Preventive Healthcare Service System in Guangdong Province                                                                          | 26-Sep-2018 | People's Government of Guangdong Province                                                                                                                                                                                                                                | Major Work Plans for Deepening the Reforms of the Medical and Health System of the latter half year of 2018                                                       |
| G42 | 广东省改革完善仿制药供应保障及使用政策实施方案                 | The Implementation Plan of the Guangdong Province on the Reform and Improvement of the Policies on the Supply, Security                                                                                     | 30-Oct-2018 | People's Government of Guangdong Province                                                                                                                                                                                                                                | Opinions of the General Office of the State Council on the Reform and Improvement of the Policies on the Supply, Security and Use of Generic Drugs                |

|     |                         |                                                                                                                                                             |             |                                                                                                                                                                                                                                                                                                                                                                                                                                                  |                                                                                                                                                                           |
|-----|-------------------------|-------------------------------------------------------------------------------------------------------------------------------------------------------------|-------------|--------------------------------------------------------------------------------------------------------------------------------------------------------------------------------------------------------------------------------------------------------------------------------------------------------------------------------------------------------------------------------------------------------------------------------------------------|---------------------------------------------------------------------------------------------------------------------------------------------------------------------------|
|     |                         | and Use of Generic Drugs                                                                                                                                    |             |                                                                                                                                                                                                                                                                                                                                                                                                                                                  |                                                                                                                                                                           |
| G43 | 广东省贫困地区健康促进三年攻坚行动实施方案   | The Implementation Plan of the Three-year action program on health promotion in poor areas in Guangdong Province                                            | 30-Dec-2018 | Health Commission of Guangdong Province<br><br>Poverty Alleviation and Development Office of Guangdong Province                                                                                                                                                                                                                                                                                                                                  | Three-year action program on health promotion in poor areas                                                                                                               |
| G44 | 广东省改革完善医疗卫生行业综合监管制度实施方案 | The Implementation Plan of Guangdong Province on the Reform and Improvement of the Comprehensive Supervision System of the Medical and Health Care Industry | 28-Feb-2019 | *People's Government of Guangdong Province                                                                                                                                                                                                                                                                                                                                                                                                       | Guiding Opinions of the General Office of the State Council on the Reform and Improvement of the Comprehensive Supervision System of the Medical and Health Care Industry |
| G45 | 广东省促进护理服务业改革与发展实施方案     | The Implementation Plan of Guangdong Province on promoting the reform and development of the care service industry                                          | 26-Mar-2019 | *Health Commission of Guangdong Province/*uangdong Provincial Development and Reform Commission/*epartment of Education of Guangdong Province /*epartment of Civil Affairs of Guangdong Province /*epartment of Finance of Guangdong Province /*uman Resources and Social Security/*epartment of Guangdong Province uangdong/*dministration for Market Regulation Healthcare Security Administration of Guangdong Province/*Guangdong Provincial | Guidance on promoting the reform and development of the care service industry                                                                                             |

|     |                                              |                                                                                                                                    |             |                                                                                                                                                                                                                                                                                                                                                                       |                                                                                                                 |
|-----|----------------------------------------------|------------------------------------------------------------------------------------------------------------------------------------|-------------|-----------------------------------------------------------------------------------------------------------------------------------------------------------------------------------------------------------------------------------------------------------------------------------------------------------------------------------------------------------------------|-----------------------------------------------------------------------------------------------------------------|
|     |                                              |                                                                                                                                    |             | Regulatory Bureau of China<br>Banking and Insurance Regulatory<br>Commission (CBIRC)/<br>Guangdong<br>Federation of the<br>Disabled/<br>Traditional Chinese<br>Medicine Bureau of Guangdong<br>Province                                                                                                                                                               |                                                                                                                 |
| G46 | 广东省全面提升县级医院综合能力<br>实施方案 ( 2019-2021 年 )      | The Implementation Plan of Guangdong Province for fully<br>upgrading the comprehensive capacity of county hospitals<br>(2019-2021) | 3-Apr-2019  | *Health Commission of Guangdong<br>Province/<br>Traditional Chinese<br>Medicine Bureau of Guangdong<br>Province                                                                                                                                                                                                                                                       | Work plans for fully upgrading the comprehensive capacity of county hospitals<br>(2018-2020)                    |
| G47 | 转发国家卫生健康委办公厅关于做<br>好 2019 年家庭医生签约服务工作的<br>通知 | Forwarded Notice of the General Office of the National Health<br>Commission on Family Doctor Contracting Services in 2019          | 13-May-2019 | Health Commission of Guangdong<br>Province                                                                                                                                                                                                                                                                                                                            | Notice of the General Office of the National Health Commission on Family<br>Doctor Contracting Services in 2019 |
| G48 | 关于贯彻落实国家基本药物制度的<br>实施意见                      | Opinions on fully implementing the National Basic Drug System                                                                      | 6-Jun-2019  | *Health Commission of Guangdong<br>Province/<br>Guangdong Provincial<br>Development and Reform<br>Commission/<br>Department of Industry<br>and Information Technology of<br>Guangdong Province/<br>Department of<br>Finance of Guangdong Province<br>/<br>Healthcare Security Administration<br>of Guangdong Province/<br>Guangdong<br>Provincial Drug Administration | Opinions of the General Office of the State Council on Improving the National<br>Basic Drug System              |
| G49 | 广东省深化医药卫生体制改革 2019<br>年重点工作任务                | Major Work Plan of Guangdong Province for Deepening the<br>Reforms of the Medical and Health System of 2019                        | 18-Jul-2019 | Medical Reform Office of<br>Guangdong Province                                                                                                                                                                                                                                                                                                                        | Major Work Plans for Deepening the Reforms of the Medical and Health<br>System of 2019                          |

|     |                              |                                                                                                                                                                     |             |                                                                                                                                                                                                                                                                                                         |                                                                                                                                                                                                                                                                                                                     |
|-----|------------------------------|---------------------------------------------------------------------------------------------------------------------------------------------------------------------|-------------|---------------------------------------------------------------------------------------------------------------------------------------------------------------------------------------------------------------------------------------------------------------------------------------------------------|---------------------------------------------------------------------------------------------------------------------------------------------------------------------------------------------------------------------------------------------------------------------------------------------------------------------|
| G50 | 广东省建设“互联网+医疗健康”示范省行动方案       | Action Plans for the Construction of " Internet+Medical Health" Demonstration Province of Guangdong Province                                                        | 13-Nov-2019 | *Health Commission of Guangdong Province/*Department of Industry and Information Technology of Guangdong Province/*Healthcare Security Administration of Guangdong Province/*Guangdong Provincial Government Services Data Management Bureau /*Traditional Chinese Medicine Bureau Of Guangdong Provinc | Opinions of the General Office of the State Council on Promoting the Development of "Internet + Medical " Health                                                                                                                                                                                                    |
| G51 | 广东省人民政府关于实施健康广东行动的意见         | Opinions of he People's Government of Guangdong Province on Implementing the Healthy Guangdong Action                                                               | 28-Dec-2019 | *People's Government of Guangdong Province                                                                                                                                                                                                                                                              | Opinions of the State Council on Implementing the Healthy China Action                                                                                                                                                                                                                                              |
| G52 | 广东省推广福建省和三明市深化医药卫生体制改革经验行动方案 | Action Plan for Guangdong Province on further promoting the experience of Fujian Province and Sanming City in deepening the reform of the medical and health system | 2-Jan-2020  | *Guangdong Provincial Leading Group for Deepening Reform of the Medical and Health System                                                                                                                                                                                                               | ①Notice on further promoting the experience of Fujian Province and Sanming City in deepening the reform of the medical and health system<br>②Several policy measures on further deepening the reform of the pharmaceutical and healthcare system through centralized procurement and use of drugs as a breakthrough |
| G53 | 广东省关于建立完善老年健康服务体系实施方案        | The Implementation Plan of Guangdong Province on the Establishment and Improvement of a Health Service System for the Elderly                                       | 19-May-2020 | *Health Commission of Guangdong Province /*Guangdong Provincial Development and Reform Commission /*Department of Education of Guangdong Province /*Department of Civil Affairs of Guangdong Province/*Department of Finance of Guangdong Province                                                      | Guiding Opinions on the Establishment and Improvement of a Health Service System for the Elderly                                                                                                                                                                                                                    |

|                                  |                                              |                                                                                                                                                                                                                                                    |             |                                                                                                                                                                                             |                                                                                                                    |
|----------------------------------|----------------------------------------------|----------------------------------------------------------------------------------------------------------------------------------------------------------------------------------------------------------------------------------------------------|-------------|---------------------------------------------------------------------------------------------------------------------------------------------------------------------------------------------|--------------------------------------------------------------------------------------------------------------------|
|                                  |                                              |                                                                                                                                                                                                                                                    |             | /*Human Resources and Social Security Department of Guangdong Province/*Healthcare Security Administration of Guangdong Province/*Traditional Chinese Medicine Bureau Of Guangdong Province |                                                                                                                    |
| G54                              | 广东省紧密型县域医疗卫生共同体慢病管理中心运行指南( 试行 )等 15 个指南      | Guidelines for the Operation of Chronic Disease Management Centres in Close-knit County Medical and Health Communities in Guangdong Province (Trial) and 15 other guidelines                                                                       | 15-Jun-2020 | *Health Commission of Guangdong Province/*Traditional Chinese Medicine Bureau Of Guangdong Province                                                                                         | Notice on promoting the construction of close-knit county medical and healthcare communities                       |
| G55                              | 转发国家医保局 财政部 国家税务总局关于做好 2020 年城乡居民基本医疗保障工作的通知 | Notice on Implementing the Basic Health Insurance Schemes for Urban and Rural Residents in 2020 which was transmitted from the Circular of the National Health Insurance 、 the Bureau Ministry of Finance and the State Administration of Taxation | 18-Aug-2020 | *Healthcare Security Administration of Guangdong Province/*Department of Finance of Guangdong Province/*Guangdong Provincial Tax Service, State Taxation Administration                     | Notice on Implementing the Basic Health Insurance Schemes for Urban and Rural Residents in 2020                    |
| G56                              | 关于加强我省医疗联合体中医药工作的通知                          | Notice on the Effectively Strengthening Chinese Medicine work in the Construction of medical treatment combinations in Guangdong Province                                                                                                          | 31-Aug-2020 | *Traditional Chinese Medicine Bureau of Guangdong Province /*Health Commission of Guangdong Province                                                                                        | Notice on the Effectively Strengthening Chinese Medicine work in the Construction of medical treatment combination |
| G57                              | 广东省深化医药卫生体制改革近期重点工作任务                        | Major Work Plans for Deepening the Reforms of the Medical and Health System in Guangdong Province in Recent Times                                                                                                                                  | 27-Sep-2020 | Medical Reform Office of Guangdong Province                                                                                                                                                 | Major Work Plans for Deepening the Reforms of the Medical and Health System of the latter half year of 2020        |
| 14th five-year plan (2021-2025 ) |                                              |                                                                                                                                                                                                                                                    |             |                                                                                                                                                                                             |                                                                                                                    |



|     |                                           |                                                                                                                                                                                                                                                                                         |             |                                                                   |                                                                                                                                                                                                                                                                                     |
|-----|-------------------------------------------|-----------------------------------------------------------------------------------------------------------------------------------------------------------------------------------------------------------------------------------------------------------------------------------------|-------------|-------------------------------------------------------------------|-------------------------------------------------------------------------------------------------------------------------------------------------------------------------------------------------------------------------------------------------------------------------------------|
| H54 | 中共黑龙江省委黑龙江省政府关于实现巩固拓展脱贫攻坚成果同乡村振兴有效衔接的实施意见 | Implementing Opinions of the Heilongjiang Provincial Committee of the Communist Party of China and the People's Government of Heilongjiang Province on Achieving Effective Linkage between Consolidating and Expanding the Achievements of Poverty Eradication and Rural Revitalization | 19-Mar-2021 | People's Government of Heilongjiang Province                      | Implementing Opinions of the CPC Central Committee and the State Council on Achieving Effective Linkage between Consolidating and Expanding the Achievements of Poverty Eradication and Rural Revitalization                                                                        |
| H55 | 黑龙江省人民政府办公厅关于推动公立医院高质量发展的实施意见             | Implementation Opinions of the General Office of the People's Government of Heilongjiang Province on Promoting High-Quality Development of Public Hospitals                                                                                                                             | 28-Dec-2021 | People's Government of Heilongjiang Province                      | Implementation Opinions of the General Office of the State Council on Promoting High-Quality Development of Public Hospitals                                                                                                                                                        |
| H56 | 黑龙江省人民政府办公厅关于建立健全职工基本医疗保险门诊共济保障机制的实施意见    | Implementation Opinions of the General Office of the People's Government of Heilongjiang Province on the Establishment and Improvement of Outpatient Co-payment Protection Mechanism for Employees' Basic Medical Insurance                                                             | 31-Dec-2021 | People's Government of Heilongjiang Province                      | Guidelines of the General Office of the State Council on Establishing and Improving the Outpatient Co-payment Guarantee Mechanism for Employees' Basic Medical Insurance                                                                                                            |
| H57 | 黑龙江省人民政府办公厅关于健全重特大疾病医疗保险和救助制度的实施意见        | Implementation Opinions of the General Office of the People's Government of Heilongjiang Province on Improving the Medical Insurance and Relief System for Serious Diseases                                                                                                             | 31-Dec-2021 | People's Government of Heilongjiang Province                      | Implementation Opinions of the General Office of the State Council on Improving the Medical Insurance and Relief System for Serious Diseases                                                                                                                                        |
| H58 | 黑龙江省全民健身实施计划 ( 2021—2025 年 )              | The National Fitness Implementation Plan of Heilongjiang Province (2021-2025)                                                                                                                                                                                                           | 31-Dec-2021 | People's Government of Heilongjiang Province                      | National Fitness Program (2016-2020)                                                                                                                                                                                                                                                |
| H59 | 黑龙江省“十四五”医疗保障事业发展规划                       | Heilongjiang Provincial "14th Five-Year Plan" for the Development of Medical Protection Career                                                                                                                                                                                          | 31-Dec-2021 | People's Government of Heilongjiang Province                      | The 14th Five-Year Plan for Universal Health Care Coverage                                                                                                                                                                                                                          |
| H60 | 黑龙江省“十四五”中医药发展规划                          | The Fourteenth Five-Year Plan for the Development of Chinese Medicine Industry in Heilongjiang Province                                                                                                                                                                                 | 31-Dec-2021 | People's Government of Heilongjiang Province                      | ①Opinions of the Central Committee of the Communist Party of China and the State Council on Promoting the Inheritance, Innovation and Development of Traditional Chinese Medicine<br>②Outline of the Strategic Plan for the Development of Traditional Chinese Medicine (2016-2030) |
| H61 | 关于做好第六批国家组织药品集采 (胰岛素专项)落实工作的通知            | Notice on the Implementation of the Sixth Batch of Nationally Organised Collective Procurement of Drugs (Insulin Specific)                                                                                                                                                              | 11-May-2022 | *Heilongjiang Province Healthcare Security Administration/*Health | Notice on Improving the National Organization of Supporting Measures and Centralised Band Purchasing of Medicines (Insulin Specific)                                                                                                                                                |

|     |                                            |                                                                                                                                                                                                                                                        |             |                                                                                                                                                                                                                           |                                                                                                                                                                                                              |
|-----|--------------------------------------------|--------------------------------------------------------------------------------------------------------------------------------------------------------------------------------------------------------------------------------------------------------|-------------|---------------------------------------------------------------------------------------------------------------------------------------------------------------------------------------------------------------------------|--------------------------------------------------------------------------------------------------------------------------------------------------------------------------------------------------------------|
|     |                                            |                                                                                                                                                                                                                                                        |             | Commission of Heilongjiang Province                                                                                                                                                                                       |                                                                                                                                                                                                              |
| H62 | 关于做好 2022 年城乡居民基本医疗保障工作的通知                 | Notice on Implementing the Basic Health Insurance Schemes for Urban and Rural Residents in 2022                                                                                                                                                        | 31-Aug-2022 | *Heilongjiang Province Healthcare Security Administration/*Finance Bureau of Heilongjiang Province / *Education Department of Heilongjiang Province / *Heilongjiang Provincial Tax Service, State Taxation Administration | Notice on Implementing the Basic Health Insurance Schemes for Urban and Rural Residents in 2022                                                                                                              |
| H63 | 黑龙江省省本级职工基本医疗保险门诊共济保障机制实施办法                | Implementation Measures of Outpatient Co-payment Protection Mechanism of Basic Medical Insurance for Employees at the Provincial Level in Heilongjiang Province                                                                                        | 22-Dec-2022 | *Heilongjiang Province Healthcare Security Administration / *Finance Bureau of Heilongjiang Province                                                                                                                      | Guidelines of the General Office of the State Council on Establishing and Improving the Outpatient Co-payment Guarantee Mechanism for Employees' Basic Medical Insurance                                     |
| G59 | 广东省加快医学教育创新发展实施方案                          | The Implementation Plan of Guangdong Province on Accelerating the Innovative Development of Medical Education                                                                                                                                          | 29-Jan-2021 | People's Government of Guangdong Province                                                                                                                                                                                 | Guiding Opinions of the General Office of the State Council on Accelerating the Innovative Development of Medical Education                                                                                  |
| G60 | 广东省关于加快发展老年护理服务的工作方案                       | The Work Plan of Guangdong Province on Accelerating the Development of the Elderly Care Services                                                                                                                                                       | 23-Mar-2021 | *Health Commission of Guangdong Province/*Traditional Chinese Medicine Bureau Of Guangdong Province                                                                                                                       | ①Notice on Strengthening the Elderly Care Services<br>②Guiding Opinions on the Establishment and Improvement of a Health Service System for the Elderly                                                      |
| G61 | 中共广东省委 广东省人民政府关于实现巩固拓展脱贫攻坚成果同乡村振兴有效衔接的实施意见 | Implementation Opinions of Communist Party of Guangdong Province and the People's Government of Guangdong Province on Achieving Effective Linkage between Consolidating and Expanding the Achievements of Poverty Eradication and Rural Revitalisation | 31-Mar-2021 | People's Government of Guangdong Province                                                                                                                                                                                 | Implementing Opinions of the CPC Central Committee and the State Council on Achieving Effective Linkage between Consolidating and Expanding the Achievements of Poverty Eradication and Rural Revitalisation |

|     |                                    |                                                                                                                                                                                                           |             |                                                                                                                                                                                                                                                                                                                                                                                                                                        |                                                                                                                                                                                     |
|-----|------------------------------------|-----------------------------------------------------------------------------------------------------------------------------------------------------------------------------------------------------------|-------------|----------------------------------------------------------------------------------------------------------------------------------------------------------------------------------------------------------------------------------------------------------------------------------------------------------------------------------------------------------------------------------------------------------------------------------------|-------------------------------------------------------------------------------------------------------------------------------------------------------------------------------------|
| G62 | 广东省巩固拓展医疗保障脱贫攻坚成果有效衔接乡村振兴战略实施方案    | The Implementation Plan of Guangdong Province on Consolidating and Expanding the Achievements of Medical Protection against Poverty Eradication and Effectively Linking the Rural Revitalisation Strategy | 6-Jul-2021  | *Healthcare Security Administration of Guangdong Province/*Department of Civil Affairs of Guangdong Province<br>*Department of Finance of Guangdong Province/*Health Commission of Guangdong Province/*Rural Revitalization Administration of Guangdong Province/*Guangdong Provincial Tax Service, State Taxation Administration/*Guangdong Provincial Regulatory Bureau of China Banking and Insurance Regulatory Commission (CBIRC) | Implementation Opinions on Consolidating and Expanding the Achievements of Medical Protection against Poverty Eradication and Effectively Linking the Rural Revitalisation Strategy |
| G63 | 广东省深化医药卫生体制改革近期重点工作任务              | Major Work Plans for Deepening the Reforms of the Medical and Health System in Guangdong Province in Recent Times                                                                                         | 4-Aug-2021  | People's Government of Guangdong Province                                                                                                                                                                                                                                                                                                                                                                                              | Major Work Plans for Deepening the Reforms of the Medical and Health System of 2021                                                                                                 |
| G64 | 广东省医疗保障局关于开展医保支付改革促进中医药传承创新发展的指导意见 | Guidelines of the Guangdong Provincial Health Protection Bureau on Carrying Out Health Insurance Payment Reform to Promote the Inheritance, Innovation, and Development of Chinese Medicine               | 30-Sep-2021 | Healthcare Security Administration of Guangdong Province                                                                                                                                                                                                                                                                                                                                                                               | Opinions of the Central Committee of the Communist Party of China and the State Council on Promoting the Inheritance, Innovation, and Development of Traditional Chinese Medicine   |
| G65 | 广东省“十四五”时期医疗保障事业高质量发展实施方案          | The Implementation Plan for the High-quality Development of Medical Security in Guangdong Province during the "14th Five-Year Plan" Period                                                                | 25-Dec-2021 | Healthcare Security Administration of Guangdong Province                                                                                                                                                                                                                                                                                                                                                                               | The 14th Five-Year Plan for Universal Health Care Coverage                                                                                                                          |
| G66 | 广东省加快发展康复医疗服务工作                    | The Implementation Plan on Accelerating the Development of                                                                                                                                                | 4-Jan-2022  | *Health Commission of Guangdong                                                                                                                                                                                                                                                                                                                                                                                                        | Opinions on Accelerating the Development of Rehabilitation Medicine                                                                                                                 |

|     |                               |                                                                                                                                                                               |             |                                                                                                                                                                                                                                                                                                                                                                             |                                                                                                                                                                                  |
|-----|-------------------------------|-------------------------------------------------------------------------------------------------------------------------------------------------------------------------------|-------------|-----------------------------------------------------------------------------------------------------------------------------------------------------------------------------------------------------------------------------------------------------------------------------------------------------------------------------------------------------------------------------|----------------------------------------------------------------------------------------------------------------------------------------------------------------------------------|
|     | 的实施方案                         | Rehabilitation Medicine in Guangdong Province                                                                                                                                 |             | Province/*Guangdong Provincial Development and Reform Commission/*Department of Education of Guangdong Province /*Department of Civil Affairs of Guangdong Province/*Department of Finance of Guangdong Province/*Healthcare Security Administration of Guangdong Province/*Traditional Chinese Medicine Bureau of Guangdong Province/*Guangdong Federation of the Disabled |                                                                                                                                                                                  |
| G67 | 广东省深入推广福建省三明市经验深化医药卫生体制改革实施方案 | The Implementation Plan of Guangdong Province on Deepening the Reform of the Medical and Health System by Further Promoting the Experience of Sanming City, Fujian Province   | 20-Jan-2022 | Guangdong Provincial Leading Group for Deepening Reform of the Medical and Health System                                                                                                                                                                                                                                                                                    | Implementing Opinions on Deepening the Reform of the Medical and Health System by Further Promoting the Experience of Sanming City, Fujian Province                              |
| G68 | 广东省人民政府办公厅关于推动公立医院高质量发展的实施意见  | Implementation Opinions of the General Office of the People's Government of Guangdong Province of the State Council on Promoting High-Quality Development of Public Hospitals | 10-Feb-2022 | People's Government of Guangdong Province                                                                                                                                                                                                                                                                                                                                   | Implementation Opinions of the General Office of the State Council on Promoting High-Quality Development of Public Hospitals                                                     |
| G69 | 广东省建设国家中医药综合改革示范区实施方案         | The Implementation Plan for the Construction of National Chinese Medicine Comprehensive Reform Demonstration Zone in Guangdong Province                                       | 14-Jun-2022 | People's Government of Guangdong Province                                                                                                                                                                                                                                                                                                                                   | Opinions of the Central Committee of the Communist Party of China and the State Council on Promoting the Inheritance, Innovation and Development of Traditional Chinese Medicine |
| G70 | 广东省深化医药卫生体制改革近期重点工作任务         | Major Work Plans for Deepening the Reforms of the Medical and Health System in Guangdong Province in Recent Times                                                             | 7-Aug-2022  | People's Government of Guangdong Province                                                                                                                                                                                                                                                                                                                                   | Major Work Plans for Deepening the Reforms of the Medical and Health System of 2022                                                                                              |

|     |                                              |                                                                                                                                                                                                                                                    |             |                                                                                                                                                                          |                                                                                                 |
|-----|----------------------------------------------|----------------------------------------------------------------------------------------------------------------------------------------------------------------------------------------------------------------------------------------------------|-------------|--------------------------------------------------------------------------------------------------------------------------------------------------------------------------|-------------------------------------------------------------------------------------------------|
| G71 | 转发国家医保局 财政部 国家税务总局关于做好 2022 年城乡居民基本医疗保障工作的通知 | Notice on Implementing the Basic Health Insurance Schemes for Urban and Rural Residents in 2022 which was transmitted from the Circular of the National Health Insurance 、 the Bureau Ministry of Finance and the State Administration of Taxation | 15-Aug-2022 | *Healthcare Security Administration of Guangdong Province/*Department of Finance of Guangdong Province /*Guangdong Provincial Tax Service, State Taxation Administration | Notice on Implementing the Basic Health Insurance Schemes for Urban and Rural Residents in 2022 |
| G72 | 广东省医疗卫生服务体系“十四五”规划                           | The 14th Five-Year Plan of Guangdong Medical and Healthcare Service System                                                                                                                                                                         | 25-Aug-2022 | *Health Commission of Guangdong Province/*Guangdong Provincial Development and Reform Commission                                                                         | "Healthy China 2030" blueprint                                                                  |

Supplementary file 6

Twelve Highly Cited Policy Initiatives and Their Associated Strategies and Actions from Thematic Analysis

| Highly Referenced Policy Initiatives     | Number                                | Associated Strategies and Actions                                                                                                                                                                                                                                                                                                                                                                                                                                                                                                                                                                                                                                                                                                                   |
|------------------------------------------|---------------------------------------|-----------------------------------------------------------------------------------------------------------------------------------------------------------------------------------------------------------------------------------------------------------------------------------------------------------------------------------------------------------------------------------------------------------------------------------------------------------------------------------------------------------------------------------------------------------------------------------------------------------------------------------------------------------------------------------------------------------------------------------------------------|
| Construction of Medical Alliance Systems | 81 (Heilongjiang)<br>148 (Guangdong)  | ①Reforming the Management Mechanism and Performance Evaluation System of Public Hospitals and deepen the reform of personnel systems in public hospitals.<br><br>②Implementing Government Incentive Policies for Public Hospitals, and establish a scientific compensation mechanism.<br><br>③Promoting Pilot Reforms of the Salary System in Public Hospitals.<br><br>④Improving the Internal Division of Labor and Collaboration Mechanisms within Medical Alliances and strengthening the construction of regional centers.<br><br>⑤Clarifying the Functional Positioning of Hospitals at Various Levels and optimizing the allocation of medical resources.<br><br>⑥Mutual Recognition of Inspection and Test Results within Medical Alliances. |
| The Basic Health Insurance System        | 189 (Heilongjiang)<br>176 (Guangdong) | ①Establishing a Unified Provincial Medical Security Service System.<br><br>②Promoting Reforms in Compound Medical Insurance Payment Methods and implementing                                                                                                                                                                                                                                                                                                                                                                                                                                                                                                                                                                                        |

|  |  |                                                                                                                                                                                                                                                                                                                                                                                                                                                                                                                                                                                                                                     |
|--|--|-------------------------------------------------------------------------------------------------------------------------------------------------------------------------------------------------------------------------------------------------------------------------------------------------------------------------------------------------------------------------------------------------------------------------------------------------------------------------------------------------------------------------------------------------------------------------------------------------------------------------------------|
|  |  | <p>comprehensive medical assistance policies.</p> <p>③Optimizing Direct Settlement Services for Cross-Regional Medical Treatment.</p> <p>④Improving and Unifying the Supervision of the Medical Insurance Fund and implementing management measures for designated medical institutions.</p> <p>⑤Standardizing Basic Medical Insurance Benefits and achieving unified medical insurance coordination within regions.</p> <p>⑥Unifying the Directory and Standards for Chronic and Special Disease Outpatient Services Province-wide.</p> <p>⑦Advancing Reforms and Supervision of Medical Service Pricing in an Orderly Manner.</p> |
|--|--|-------------------------------------------------------------------------------------------------------------------------------------------------------------------------------------------------------------------------------------------------------------------------------------------------------------------------------------------------------------------------------------------------------------------------------------------------------------------------------------------------------------------------------------------------------------------------------------------------------------------------------------|

|                                          |                                     |                                                                                                                                                                                                                                                                                                                                                                                                                                                                                                                                                                                                                                                                                                                                                                                                                                                                                                                 |
|------------------------------------------|-------------------------------------|-----------------------------------------------------------------------------------------------------------------------------------------------------------------------------------------------------------------------------------------------------------------------------------------------------------------------------------------------------------------------------------------------------------------------------------------------------------------------------------------------------------------------------------------------------------------------------------------------------------------------------------------------------------------------------------------------------------------------------------------------------------------------------------------------------------------------------------------------------------------------------------------------------------------|
| Strengthen Primary Health Care Personnel | 50 (Heilongjiang)<br>77 (Guangdong) | <p>①Exploring and Improving the Standardized Training System and Guarantee Mechanism for Resident Physicians.</p> <p>②Facilitating Registration and Management Mechanisms for Multi-site Practice of Physicians.</p> <p>③Establishing a Salary System Adapted to the Characteristics of the Healthcare Industry and improving performance evaluation and distribution mechanisms.</p> <p>④Strengthening the Construction of the Rural Doctor Workforce and formulating management measures for hiring, practicing activities, compensation, and retirement of rural doctors.</p> <p>⑤Providing Preferential Policies for Primary Health Technicians in Promotion and Benefits and encourage medical students to work in ethnic areas through favorable policies.</p> <p>⑥Enhancing the Training and Team Building of Traditional Chinese Medicine and Ethnic Medicine Practitioners at the Grassroots Level</p> |
| Diversified Medical Service System       | 40 (Heilongjiang)<br>25 (Guangdong) | <p>①Implementing Support and Guidance Policies for Social Capital in Medical Services.</p> <p>②Facilitating the Establishment of Private Medical Institutions and encouraging the participation of private capital.</p> <p>③Enhancing the Regulatory System for Private Medical Institutions and improving the</p>                                                                                                                                                                                                                                                                                                                                                                                                                                                                                                                                                                                              |



|                                                                    |                                                    |                                                                                                                                                                                                                                                                                                                                                                                                                                                                                                                                                                                                                                                                                                                  |
|--------------------------------------------------------------------|----------------------------------------------------|------------------------------------------------------------------------------------------------------------------------------------------------------------------------------------------------------------------------------------------------------------------------------------------------------------------------------------------------------------------------------------------------------------------------------------------------------------------------------------------------------------------------------------------------------------------------------------------------------------------------------------------------------------------------------------------------------------------|
|                                                                    |                                                    | <p>service capabilities and quality of private hospitals.</p> <p>④Promoting the Development of Health Industry Clusters and fostering a diversified and competitive medical service system.</p>                                                                                                                                                                                                                                                                                                                                                                                                                                                                                                                  |
| <p><b>Traditional Chinese Medical (TMC)<br/>Service System</b></p> | <p><b>152(Heilongjiang)<br/>89(Guangdong)</b></p>  | <p>①Enhance Grassroots TCM Service Capacity and enrich the content of grassroots TCM services and promote appropriate TCM techniques..</p> <p>②Strengthen the TCM Talent Pool and improve the evaluation and incentive system for TCM talent.</p> <p>③Utilize TCM Advantages. Leverage TCM's unique strengths in disease prevention, diagnosis, and rehabilitation.</p> <p>④Support the Development of TCM Health Services and actively support industries related to TCM health services.</p> <p>⑤Reform and Improve TCM Management Systems and enhance the management of ethnic medicine.</p> <p>⑥Improve TCM Informatization and Infrastructure and enhance the application level of TCM informatization.</p> |
| <p><b>Digitalization Health System</b></p>                         | <p><b>26 (Heilongjiang)<br/>34 (Guangdong)</b></p> | <p>①Establish Standards for "Internet + Healthcare" and develop an integrated online and offline healthcare service model covering pre-diagnosis, diagnosis, and post-diagnosis.</p>                                                                                                                                                                                                                                                                                                                                                                                                                                                                                                                             |

|                                              |                                            |                                                                                                                                                                                                                                                                                                                                                                                                                                                                                                                                                                                                                          |
|----------------------------------------------|--------------------------------------------|--------------------------------------------------------------------------------------------------------------------------------------------------------------------------------------------------------------------------------------------------------------------------------------------------------------------------------------------------------------------------------------------------------------------------------------------------------------------------------------------------------------------------------------------------------------------------------------------------------------------------|
|                                              |                                            | <p>②Use Informatization to Improve Hospital Management and Enhance hospital management and convenient services through information technology.</p> <p>③Integrate and Improve the Information System for Medical Insurance Funds and optimize the information system for medical insurance funds.</p> <p>④Promote the Informatization of Integrated Medical and Elderly Care and use information technology to develop intelligent TCM health and elderly care services.</p> <p>⑤Build an Informatized Basic Public Health Service Platform and manage basic public health services through an informatized platform.</p> |
| <b>Tiered Health Service Delivery System</b> | <b>55(Heilongjiang)<br/>116(Guangdong)</b> | <p>①Progressively Promote the Tiered Diagnosis and Treatment System and implement bidirectional referrals.</p> <p>②Promote Balanced Distribution of High-Quality Medical Resources and ensure an equitable distribution of high-quality medical resources.</p> <p>③Strengthen Support Measures for Tiered Diagnosis and Treatment and improve and implement supporting policies for tiered diagnosis and treatment.</p>                                                                                                                                                                                                  |
| <b>The Essential Medicine policy</b>         | <b>75(Heilongjiang)<br/>96(Guangdong)</b>  | <p>①Strengthen Rational Use and Supervision of Basic Medicines in Medical Institutions and improve the evaluation system for essential medicines.</p> <p>②Establish a Comprehensive Drug Supply Security System and promote the collective</p>                                                                                                                                                                                                                                                                                                                                                                           |

|                                                |                                           |                                                                                                                                                                                                                                                                                                                                                                                                                                                                                                                                                                                                                                                                                                                                                                                                                                   |
|------------------------------------------------|-------------------------------------------|-----------------------------------------------------------------------------------------------------------------------------------------------------------------------------------------------------------------------------------------------------------------------------------------------------------------------------------------------------------------------------------------------------------------------------------------------------------------------------------------------------------------------------------------------------------------------------------------------------------------------------------------------------------------------------------------------------------------------------------------------------------------------------------------------------------------------------------|
|                                                |                                           | <p>procurement and price management of medicines and consumables.</p> <p>③Improve the Dynamic Adjustment of the Medical Insurance Drug List and optimize the management system for the Medical Insurance Drug List.</p> <p>④Improve Drug Safety Shortage Monitoring and Emergency Response Mechanisms and enhance the monitoring and emergency response mechanisms for drug shortages.</p> <p>⑤Reform and Improve Generic Drug Supply Policies and optimize policies for the supply of generic drugs.</p>                                                                                                                                                                                                                                                                                                                         |
| <p>The Basic Public Health Service Package</p> | <p>34(Heilongjiang)<br/>83(Guangdong)</p> | <p>①Fully Implement Major Public Health Service Projects and consolidate and improve the equalization system for basic public health services.</p> <p>②Build a Comprehensive Chronic Disease Prevention and Control System, promote collaboration between medical treatment and prevention, and establish chronic disease prevention and control demonstration areas.</p> <p>③Strengthen Performance Evaluation of Basic Public Health Services in Grassroots Medical Institutions and improve performance evaluation and assessment mechanisms.</p> <p>④Establish a Funding Security Mechanism for Public Health Services in Medical Institutions and secure funding for public health services.</p> <p>⑤Strengthen the Medical and Nursing Security System and develop a high-quality and efficient nursing service system.</p> |

|                                          |                                     |                                                                                                                                                                                                                                                                                                                                                                                                                                                                                                                                                                                                                                                                                                                                                                                                 |
|------------------------------------------|-------------------------------------|-------------------------------------------------------------------------------------------------------------------------------------------------------------------------------------------------------------------------------------------------------------------------------------------------------------------------------------------------------------------------------------------------------------------------------------------------------------------------------------------------------------------------------------------------------------------------------------------------------------------------------------------------------------------------------------------------------------------------------------------------------------------------------------------------|
| Elderly medical care and security system | 54 (Heilongjiang)<br>66(Guangdong)  | <p>①mprove Elderly Healthcare and Promote the Development of the Elderly Health Industry and enhance elderly healthcare services.</p> <p>②Establish and Improve a Universal, Regionally Coordinated, and Integrated Pension Security System and develop a comprehensive pension security system.</p> <p>③Promote the Development of the TCM Health and Elderly Care Industry and support the growth of the TCM health and elderly care industry.</p> <p>④Encourage the "Medical-Nursing Combined" Elderly Care Model and develop community-based integrated medical and elderly care services, including home-based palliative care.</p> <p>⑤Develop Talent Training and Team Building for Elderly Care Services and expand the workforce for integrated medical and elderly care services.</p> |
| Health Education and Promotion           | 56 (Heilongjiang)<br>61 (Guangdong) | <p>①Promote Healthy Lifestyles Nationwide and implement personalized health interventions.</p> <p>②Create a Supportive Environment for Health, and improve policies that support health.</p> <p>③Conduct Nationwide Fitness Activities and promote community sports events and fitness activities for key populations.</p> <p>④Improve Nutrition Regulations and Standards and strengthen the construction of nutrition disciplines and professional teams.</p>                                                                                                                                                                                                                                                                                                                                 |

|                                   |                                     |                                                                                                                                                                                                                                                                                                                                                                                                                      |
|-----------------------------------|-------------------------------------|----------------------------------------------------------------------------------------------------------------------------------------------------------------------------------------------------------------------------------------------------------------------------------------------------------------------------------------------------------------------------------------------------------------------|
|                                   |                                     | ⑤Establish a Team of Health Science Experts and conduct widespread health education tours.                                                                                                                                                                                                                                                                                                                           |
| Family Doctor Contracting Service | 20 (Heilongjiang)<br>25 (Guangdong) | ①Standardize Contracted Service Projects and Funding Management and regulate the implementation and funding of contracted services.<br><br>②Implement and Promote Family Doctor Contracting Services and improve related policies and supporting documents.<br><br>③Optimize the Income Distribution and Incentive Mechanism for Family Doctor Teams and enhance the motivation and remuneration for family doctors. |

Supplementary file 7

The pattern and content of extension and reduction of selected examples of policies

| The Pattern of Extension Policies | Extention                                                                                                                                               | Province                                                                                                                                                                                                                                                                                                                                                                                                                                                     | Nation                                                                                                                                                     |
|-----------------------------------|---------------------------------------------------------------------------------------------------------------------------------------------------------|--------------------------------------------------------------------------------------------------------------------------------------------------------------------------------------------------------------------------------------------------------------------------------------------------------------------------------------------------------------------------------------------------------------------------------------------------------------|------------------------------------------------------------------------------------------------------------------------------------------------------------|
| Increase Scope of Application     | Provincial governments, when formulating local policies, may expand the scope of application to include a broader population within their jurisdiction. | Encouraging the development of non-public traditional Chinese medicine (TCM) institutions, allowing qualified TCM professionals, especially renowned TCM practitioners, to establish TCM clinics or practice individually. This includes the policy on promoting "Internet + Healthcare" to facilitate easier access to medical services (Implementation Opinions on Promoting "Internet + Healthcare" for Easier Access to Medical Services, July 8, 2019). | Actively promoting the development of non-public TCM institutions (Opinions of the State Council on Promoting the Development of "Internet + Healthcare"). |

|                  |                                                                                                                                                                                                                                    |                                                                                                                                                                                                                                                                                                                                                                                                                                                                                                                                                                                                                                                                                                                                                                                                                 |                                                                                                                                                                                                                                                |
|------------------|------------------------------------------------------------------------------------------------------------------------------------------------------------------------------------------------------------------------------------|-----------------------------------------------------------------------------------------------------------------------------------------------------------------------------------------------------------------------------------------------------------------------------------------------------------------------------------------------------------------------------------------------------------------------------------------------------------------------------------------------------------------------------------------------------------------------------------------------------------------------------------------------------------------------------------------------------------------------------------------------------------------------------------------------------------------|------------------------------------------------------------------------------------------------------------------------------------------------------------------------------------------------------------------------------------------------|
| Concretize Goals | When formulating specific policies, provincial governments may further specify the macro objectives of national policies, clarifying the implementation goals and requirements within their region to better guide implementation. | Enhancing grassroots TCM service capabilities by encouraging TCM hospitals to lead the construction of medical consortia. By 2020, each county should establish a TCM appropriate technology promotion center, train at least 10 county-level instructors, and promote the use of no less than 45 TCM appropriate technologies. By 2022, all community health service centers and township health centers should be able to provide more than six types of standardized TCM appropriate technologies, and 75% of village health stations should be able to provide more than four types (Implementation Opinions of the Heilongjiang Provincial Committee of the Communist Party of China and Heilongjiang Provincial Government on Promoting the Inheritance and Innovative Development of TCM, June 1, 2020). | Supporting TCM hospitals in leading the formation of medical consortia (Opinions of the Central Committee of the Communist Party of China and the State Council on Promoting the Inheritance and Innovative Development of TCM [2019] No. 43). |
|------------------|------------------------------------------------------------------------------------------------------------------------------------------------------------------------------------------------------------------------------------|-----------------------------------------------------------------------------------------------------------------------------------------------------------------------------------------------------------------------------------------------------------------------------------------------------------------------------------------------------------------------------------------------------------------------------------------------------------------------------------------------------------------------------------------------------------------------------------------------------------------------------------------------------------------------------------------------------------------------------------------------------------------------------------------------------------------|------------------------------------------------------------------------------------------------------------------------------------------------------------------------------------------------------------------------------------------------|

|                     |                                                                                                                                                                          |                                                                                                                                                                                                                                                                                                                                                                                                                                                                                                                                                                                                                                                                                                                                                                                                                                                                                                                                                                                                                                                                                                                                                                                                                                                    |                                                                                                                                                                                                                                                                                                            |
|---------------------|--------------------------------------------------------------------------------------------------------------------------------------------------------------------------|----------------------------------------------------------------------------------------------------------------------------------------------------------------------------------------------------------------------------------------------------------------------------------------------------------------------------------------------------------------------------------------------------------------------------------------------------------------------------------------------------------------------------------------------------------------------------------------------------------------------------------------------------------------------------------------------------------------------------------------------------------------------------------------------------------------------------------------------------------------------------------------------------------------------------------------------------------------------------------------------------------------------------------------------------------------------------------------------------------------------------------------------------------------------------------------------------------------------------------------------------|------------------------------------------------------------------------------------------------------------------------------------------------------------------------------------------------------------------------------------------------------------------------------------------------------------|
| Refine the Measures | Based on local conditions, provincial governments may develop specific implementation plans, operational steps, or timelines for measures proposed in national policies. | Health insurance agencies at all levels are responsible for signing fixed-point service agreements with eligible medical institutions, clarifying mutual responsibilities, rights, and obligations, and controlling unreasonable expenditures through contract management. This aims to maintain the reimbursement ratio for inpatient medical expenses within policy coverage at around 75%. Cross-city medical treatment within the province should be managed through designated hospitals, with agreements signed between cities and medical institutions, and announced to the public in a timely manner. Medical expenses incurred by insured residents at designated medical institutions, payable by the urban and rural residents' medical insurance fund, should be advanced by the designated medical institutions, with subsequent settlement between the medical insurance agency and the medical institution as per the agreement. Out-of-pocket expenses should be settled between the individual and the designated medical institution. For insured residents hospitalized across calendar years, medical expenses should be accumulated continuously, with annual medical insurance benefits applied based on the discharge date | Strengthening the management of fixed-point service agreements, establishing and improving assessment and evaluation mechanisms, and creating dynamic access and exit mechanisms (Opinions of the State Council on Integrating the Urban and Rural Residents Basic Medical Insurance System [2016] No. 3). |
|---------------------|--------------------------------------------------------------------------------------------------------------------------------------------------------------------------|----------------------------------------------------------------------------------------------------------------------------------------------------------------------------------------------------------------------------------------------------------------------------------------------------------------------------------------------------------------------------------------------------------------------------------------------------------------------------------------------------------------------------------------------------------------------------------------------------------------------------------------------------------------------------------------------------------------------------------------------------------------------------------------------------------------------------------------------------------------------------------------------------------------------------------------------------------------------------------------------------------------------------------------------------------------------------------------------------------------------------------------------------------------------------------------------------------------------------------------------------|------------------------------------------------------------------------------------------------------------------------------------------------------------------------------------------------------------------------------------------------------------------------------------------------------------|



|                                   |                                                                                                                                                                                                                                                                                                                                                                                               |                                                                                                                                                                                                                                                                                                                                                                                                                                                                                                                        |                                                                                                                                                                                                                                                                                                                                                                        |
|-----------------------------------|-----------------------------------------------------------------------------------------------------------------------------------------------------------------------------------------------------------------------------------------------------------------------------------------------------------------------------------------------------------------------------------------------|------------------------------------------------------------------------------------------------------------------------------------------------------------------------------------------------------------------------------------------------------------------------------------------------------------------------------------------------------------------------------------------------------------------------------------------------------------------------------------------------------------------------|------------------------------------------------------------------------------------------------------------------------------------------------------------------------------------------------------------------------------------------------------------------------------------------------------------------------------------------------------------------------|
| Strengthen Enforcement            | To ensure the effective implementation of national policies in their regions, provincial governments may develop stricter enforcement measures, including enhancing supervision, improving implementation efficiency, and increasing the supervisory capacity of functional departments. These measures help ensure the smooth implementation of policies and the achievement of their goals. | Strictly enforcing hospital financial accounting systems by establishing and implementing a chief accountant system in tertiary public hospitals, improving financial analysis and reporting systems, and strengthening economic operation analysis and monitoring to supervise hospital economic operations and financial activities (Guiding Opinions on the Pilot Reform of Urban Public Hospitals by the Heilongjiang Provincial Health and Family Planning Commission and other departments, September 16, 2014). | Improving hospital financial and accounting management systems (Notification on the Issuance of Guiding Opinions on the Pilot Reform of Public Hospitals [2010] No. 20).                                                                                                                                                                                               |
| The Pattern of Reduction Policies | Extention                                                                                                                                                                                                                                                                                                                                                                                     | Province                                                                                                                                                                                                                                                                                                                                                                                                                                                                                                               | Nation                                                                                                                                                                                                                                                                                                                                                                 |
| Decrease Scope of Application     | When formulating local policies, provincial governments may narrow the scope of application to specific areas or populations within their jurisdiction.                                                                                                                                                                                                                                       | Actively conducting pilot projects for multi-site practice of licensed physicians (Notification on the Main Work Arrangements for the Five Key Reforms of the Medical and Health System in Heilongjiang Province in 2011).                                                                                                                                                                                                                                                                                             | Formulating normative documents for multi-site practice of licensed physicians, relaxing the conditions for pilot projects, increasing the number of practice sites, and expanding the pilot scope to all qualified cities (Notification on the Main Work Arrangements for the Five Key Reforms of the Medical and Health System in 2011 [State Office [2011] No. 8]). |

|                |                                                                                                                                                                                                                                       |                                                                                                                                                                                                                                                            |                                                                                                                                                                                                                                                                                                                                                                               |
|----------------|---------------------------------------------------------------------------------------------------------------------------------------------------------------------------------------------------------------------------------------|------------------------------------------------------------------------------------------------------------------------------------------------------------------------------------------------------------------------------------------------------------|-------------------------------------------------------------------------------------------------------------------------------------------------------------------------------------------------------------------------------------------------------------------------------------------------------------------------------------------------------------------------------|
| Lower the Goal | <p>In some cases, provincial governments may lower the standards of national policies due to local conditions being unable to meet national standards or to better balance resource allocation and policy implementation effects.</p> | <p>Conducting hierarchical diagnosis and treatment pilot projects in public hospital comprehensive reform pilot cities (Notification on the Key Tasks for Deepening Medical and Health System Reform in Heilongjiang Province in 2016, July 14, 2016).</p> | <p>Accelerating the promotion of hierarchical diagnosis and treatment, focusing on comprehensive reform pilot provinces and public hospital comprehensive reform pilot cities, and conducting pilot projects in about 70% of prefecture-level cities (Notification on the Key Tasks for Deepening Medical and Health System Reform in 2016 [State Office [2016] No. 26]).</p> |
|----------------|---------------------------------------------------------------------------------------------------------------------------------------------------------------------------------------------------------------------------------------|------------------------------------------------------------------------------------------------------------------------------------------------------------------------------------------------------------------------------------------------------------|-------------------------------------------------------------------------------------------------------------------------------------------------------------------------------------------------------------------------------------------------------------------------------------------------------------------------------------------------------------------------------|

|                             |                                                                                                                                                                                                                                                                      |                                                                                                                                                                                                                                                                                                                                                                                                                           |                                                                                                                                                                                                                                                                                                                                                                                                                                                                                                                                                                                                                                                                                                                                                                                               |
|-----------------------------|----------------------------------------------------------------------------------------------------------------------------------------------------------------------------------------------------------------------------------------------------------------------|---------------------------------------------------------------------------------------------------------------------------------------------------------------------------------------------------------------------------------------------------------------------------------------------------------------------------------------------------------------------------------------------------------------------------|-----------------------------------------------------------------------------------------------------------------------------------------------------------------------------------------------------------------------------------------------------------------------------------------------------------------------------------------------------------------------------------------------------------------------------------------------------------------------------------------------------------------------------------------------------------------------------------------------------------------------------------------------------------------------------------------------------------------------------------------------------------------------------------------------|
| Directly Delete the Content | When formulating local policies, provincial governments may selectively reduce content from national policies if they believe certain content is not applicable locally or if resources are limited and cannot fully implement all aspects of the national policies. | Strengthening the construction of national TCM clinical research bases, key TCM hospitals in the inheritance and innovation project, and regional TCM (specialty) diagnosis and treatment centers (Implementation Opinions of the Heilongjiang Provincial Committee of the Communist Party of China and Heilongjiang Provincial Government on Promoting the Inheritance and Innovative Development of TCM, June 1, 2020). | Accelerating the construction of TCM evidence-based medicine centers, screening 50 advantageous TCM disease treatments, 100 appropriate techniques, and 100 unique TCM formulations within approximately three years, and promptly announcing them to the public. Focusing on issues such as cancer, cardiovascular and cerebrovascular diseases, diabetes, infectious diseases, Alzheimer's disease, and antibiotic resistance, conducting collaborative research between Chinese and Western medicine, and forming and promoting about 50 integrated Chinese-Western medicine diagnosis and treatment plans by 2022 (Opinions of the Central Committee of the Communist Party of China and the State Council on Promoting the Inheritance and Innovative Development of TCM [2019] No. 43). |
|-----------------------------|----------------------------------------------------------------------------------------------------------------------------------------------------------------------------------------------------------------------------------------------------------------------|---------------------------------------------------------------------------------------------------------------------------------------------------------------------------------------------------------------------------------------------------------------------------------------------------------------------------------------------------------------------------------------------------------------------------|-----------------------------------------------------------------------------------------------------------------------------------------------------------------------------------------------------------------------------------------------------------------------------------------------------------------------------------------------------------------------------------------------------------------------------------------------------------------------------------------------------------------------------------------------------------------------------------------------------------------------------------------------------------------------------------------------------------------------------------------------------------------------------------------------|

## Reference

1. Organization, W.H. *Package of Essential Noncommunicable (PEN) Disease Interventions for Primary Health Care in Low-Resource Settings*. 2010.
2. Organization, W.H., *Regional action framework for noncommunicable disease prevention and control in the Western Pacific*. 2022.
3. State Council, C., *Circular of the General Office of the State Council on Printing and Distributing China's Medium- and Long-Term Plan for the Prevention and Treatment of Chronic Diseases (2017-2025)*. 2017.
4. Zhou, M., et al., *Mortality, morbidity, and risk factors in China and its provinces, 1990–2017: a systematic analysis for the Global Burden of Disease Study 2017*. The Lancet, 2019. **394**(10204): p. 1145-1158.
5. Xiong, S., et al., *Primary health care system responses to non-communicable disease prevention and control: a scoping review of national policies in Mainland China since the 2009 health reform*. The Lancet Regional Health - Western Pacific, 2023. **31**.
6. Ye, P., et al., *A Scoping Review of National Policies for Healthy Ageing in Mainland China from 2016 to 2020*. The Lancet Regional Health - Western Pacific, 2021. **12**.
7. Jin, Y., et al., *A scoping review of national policies for child road injury in China*. The Lancet Regional Health - Western Pacific, 2024. **46**.
